# Supplementary material for: The Effect of Branched Alkyl Chain Length on the Properties of Supramolecular Organogels from Mono-N-Alkylated Primary Oxalamides
Source: MDPI journal article supplement (doi:10.3390/gels9010005), 2022-12-22
Supplement: s1 [file s1]

## Article

# The Effect of Branched Alkyl Chain Length on the Properties of Supramolecular Organogels from Mono-*N*-Alkylated Primary Oxalamides

Khalid Azyat <sup>1</sup>, Darren Makeiff <sup>1,\*</sup>, Bradley Smith <sup>1</sup>, Mickie Wiebe <sup>1</sup>, Steve Launspach <sup>1</sup>, Ashley Wagner <sup>1</sup>, Marianna Kulka <sup>1</sup> and Nicolas Godbert <sup>2</sup>

<sup>1</sup> Nanotechnology Research Center, National Research Council of Canada, 11421 Saskatchewan Drive, Edmonton, AB T6G 2M9, Canada

<sup>2</sup> Dipartimento di Chimica e Tecnologie Chimiche, Università della Calabria, 87036 Arcavacata di Rende, CS, Italy

\* Correspondence: darren.makeiff@nrc.ca

## Supplementary Materials:

## Contents

|                                                                                                                                            |    |
|--------------------------------------------------------------------------------------------------------------------------------------------|----|
| Gelator Synthesis.....                                                                                                                     | 2  |
| Synthesis of AOx8 .....                                                                                                                    | 2  |
| <b>Figure S1a.</b> <sup>1</sup> H and <sup>13</sup> C NMR spectra of <b>AOx8</b> . ....                                                    | 4  |
| <b>Figure S1b.</b> High resolution mass spectrum of <b>AOx8</b> . ....                                                                     | 5  |
| Synthesis of AOx12 .....                                                                                                                   | 5  |
| <b>Figure S2a.</b> <sup>1</sup> H and <sup>13</sup> C NMR of <b>AOx12</b> .....                                                            | 7  |
| <b>Figure S2b.</b> High resolution mass spectrum of <b>AOx12</b> .....                                                                     | 8  |
| Synthesis of AOx16 .....                                                                                                                   | 8  |
| <b>Figure S3a.</b> <sup>1</sup> H and <sup>13</sup> C NMR of <b>AOx16</b> .....                                                            | 10 |
| <b>Figure S3b.</b> High resolution mass spectrum of <b>AOx16</b> .....                                                                     | 11 |
| Synthesis of AOx24 .....                                                                                                                   | 11 |
| <b>Figure S4a.</b> <sup>1</sup> H and <sup>13</sup> C NMR of <b>AOx24</b> .....                                                            | 14 |
| <b>Figure S4b.</b> High resolution mass spectrum of <b>AOx24</b> .....                                                                     | 15 |
| Additional Data.....                                                                                                                       | 15 |
| <b>Table S1.</b> Gelator test data for alkylated oxalamides.....                                                                           | 15 |
| <b>Table S2.</b> Hansen Solubility Parameters (HSPs) and outcomes of solubility/gelation tests with alkylated oxalamides. ....             | 16 |
| <b>Figure S5.</b> 3D Hansen space for gelation spheres (green) for alkyloxalamido gelators. ....                                           | 17 |
| <b>Table S3.</b> Coordinates of the Centers of the Solution (S) and Gelation Spheres (G1, G2) in Hansen Space and Their Radii. ....        | 17 |
| <b>Figure S6.</b> <sup>1</sup> H NMR spectra (600 MHz) of the amide region for <b>AOx24</b> in different solvents (20 mM, 0.85 wt %). .... | 18 |

|                                                                                                                                                                                                                                               |    |
|-----------------------------------------------------------------------------------------------------------------------------------------------------------------------------------------------------------------------------------------------|----|
| <b>Table S4.</b> $^1\text{H}$ NMR chemical shifts (ppm) of $\text{H}_a$ and $\text{H}_b$ for alkyloxalamides (20 mM) in $\text{CDCl}_3$ , $\text{DMSO}-d_6$ and toluene- $d_8$ at $23^\circ\text{C}$ . .....                                  | 18 |
| <b>Figure S7.</b> $^1\text{H}$ NMR (600 MHz) spectra of <b>AOx8</b> in toluene- $d_8$ from 0.5-50 mM. ....                                                                                                                                    | 19 |
| <b>Figure S8.</b> $^1\text{H}$ NMR (600 MHz) spectra of <b>AOx12</b> in toluene- $d_8$ from 1-50 mM. ....                                                                                                                                     | 20 |
| <b>Figure S9.</b> $^1\text{H}$ NMR (600 MHz) spectra of <b>AOx16</b> in toluene- $d_8$ from 0.5-50 mM. ....                                                                                                                                   | 21 |
| <b>Figure S10.</b> $^1\text{H}$ NMR (600 MHz) spectra of <b>AOx24</b> in toluene- $d_8$ from 0.5-50 mM. ....                                                                                                                                  | 22 |
| <b>Table S5.</b> FTIR data for alkylated oxalamide gelators. ....                                                                                                                                                                             | 22 |
| <b>Table S6.</b> Gel melting point $T_{\text{gel}}$ of gelators in hexadecane and propylene glycol at 1 and 2 wt % from inverted vial and rheology temperature sweep experiments.....                                                         | 23 |
| <b>Figure S11.</b> Rheology gel time and temperature sweep experiments for organogels of.....                                                                                                                                                 | 24 |
| <b>Figure S12.</b> Rheology gel time and temperature sweep experiments organogels of <b>AOx12</b> (a, b), <b>AOx16</b> (c, d) and <b>AOx24</b> (e, f) with propylene glycol. ....                                                             | 25 |
| <b>Table S7.</b> Rheological properties of organogels with hexadecane (HD) and propylene glycol (PG) at 1 wt % at $25^\circ\text{C}$ . ....                                                                                                   | 25 |
| <b>Figure S13.</b> Polarized optical micrographs of gels from alkyloxalamides with hexadecane at 1 wt % after 1 month. (a) and (b) <b>AOx12</b> . (c) <b>AOx16</b> . (d) and (e) <b>AOx24</b> . The images are $1.42\ \mu\text{m}$ wide. .... | 26 |
| <b>Figure S14.</b> Powder X-Ray diffraction patterns of organogels of alkyloxalamide gelators with hexadecane. ....                                                                                                                           | 27 |
| <b>Figure S15.</b> Powder X-Ray diffraction patterns of organogels of alkyloxalamide gelators with propylene glycol. ....                                                                                                                     | 28 |

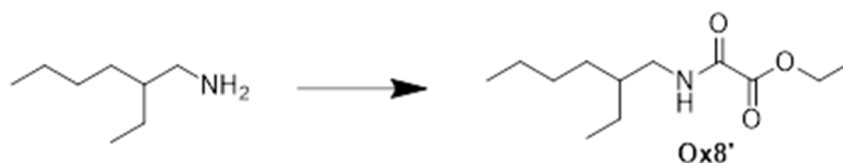

Ethyl chlorooxoacetate (5.28 g, 38.69 mmol) was added to a solution of 2-ethyl-1-hexylamine (5 g, 38.69 mmol) in anhydrous DCM (200 mL) at 0°C. Et<sub>3</sub>N (7.83 g, 77.38 mmol) was then added and the mixture was slowly warmed to 23°C. After 3 h, the reaction was washed with water (2 × 25 mL) followed by brine (25 mL). The organic layer was dried over Na<sub>2</sub>SO<sub>4</sub>, filtered, and the solvent removed by rotary evaporation to afford Ox8' as a yellow oil (8.85 g, 99%).

<sup>1</sup>H NMR (CDCl<sub>3</sub>, 600 MHz) 7.05 (br s, 1H), 4.30 (q, 2H, *J* = 7.2 Hz), 3.24 (m, 2H), 1.47 (m, 1H), 1.27–1.35 (m, 12H), 0.83–0.87 (m, 6H).

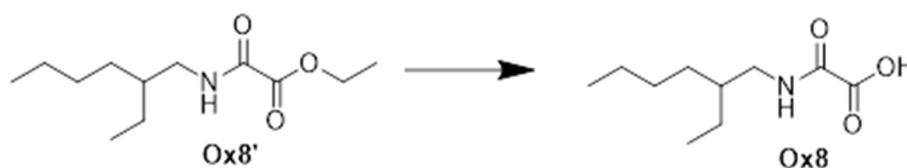

Aqueous 2.5 M NaOH (31 mL, 77.18 mmol) was added to a solution of Ox8' (8.80 g, 38.37 mmol) in THF (200 mL). The reaction was then stirred at 23°C for 4 h before 2M HCl was added to lower the pH to ~3. The excess THF was then removed by rotary evaporation and the aqueous mixture was then extracted with DCM (3 × 50 mL). The DCM extracts were combined and dried over Na<sub>2</sub>SO<sub>4</sub>, filtered and concentrated by rotary evaporation to afford Ox8 as a white solid (7.70 g, 99%).

<sup>1</sup>H NMR (CDCl<sub>3</sub>, 600 MHz) 7.26 (br s, 1H), 3.30 (m, 2H), 1.57 (m, 1H), 1.26–1.32 (m, 9H), 0.88–0.91 (m, 6H).

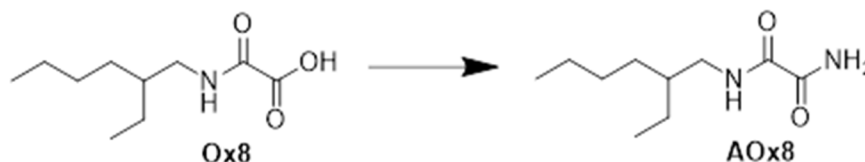

Oxalyl chloride (3.30 mL, 69.34 mmol) was added dropwise to a solution of Ox8 (7.70 g, 38.25 mmol) in anhydrous THF (150 mL) and anhydrous DMF (3 drops) at 0°C. The reaction was then slowly warmed to 23°C. After 4 h, the excess THF was removed by rotary evaporation and the crude residue was dried *in vacuo*. Fresh anhydrous THF (200 mL) was then added and the mixture was cooled to 0°C before adding aqueous NH<sub>4</sub>OH (10–30 %, 40 mL) dropwise. The mixture was then warmed to 23°C and allowed to stir for an additional 30 min., before the excess THF was removed by rotary evaporation. The white solid residue was dispersed in deionized water, filtered, and washed with deionized water before drying *in vacuo* for 18 h to afford the compound AOx8 as a white solid (5.60 g, 73%).

<sup>1</sup>H NMR (CDCl<sub>3</sub>, 600 MHz) δ 7.38 (br s, 1H), 7.31 (br s, 1H), 5.60 (br s, 1H), 3.25 (m, 2H), 1.51 (m, 1H), 1.28–1.35 (m, 8H), 0.88–0.95 (m, 6H); <sup>13</sup>C NMR (CDCl<sub>3</sub>, 600 MHz) δ 162.1, 159.4, 42.6, 39.3, 39.2, 30.9 × 2, 28.8, 24.1, 22.9, 14.0, 10.8. HRMS (ESI, M<sup>+</sup>) calcd for C<sub>10</sub>H<sub>20</sub>N<sub>2</sub>O<sub>2</sub> 223.1417 (M+Na)<sup>+</sup>, 223.1415 (M+Na)<sup>+</sup> found.

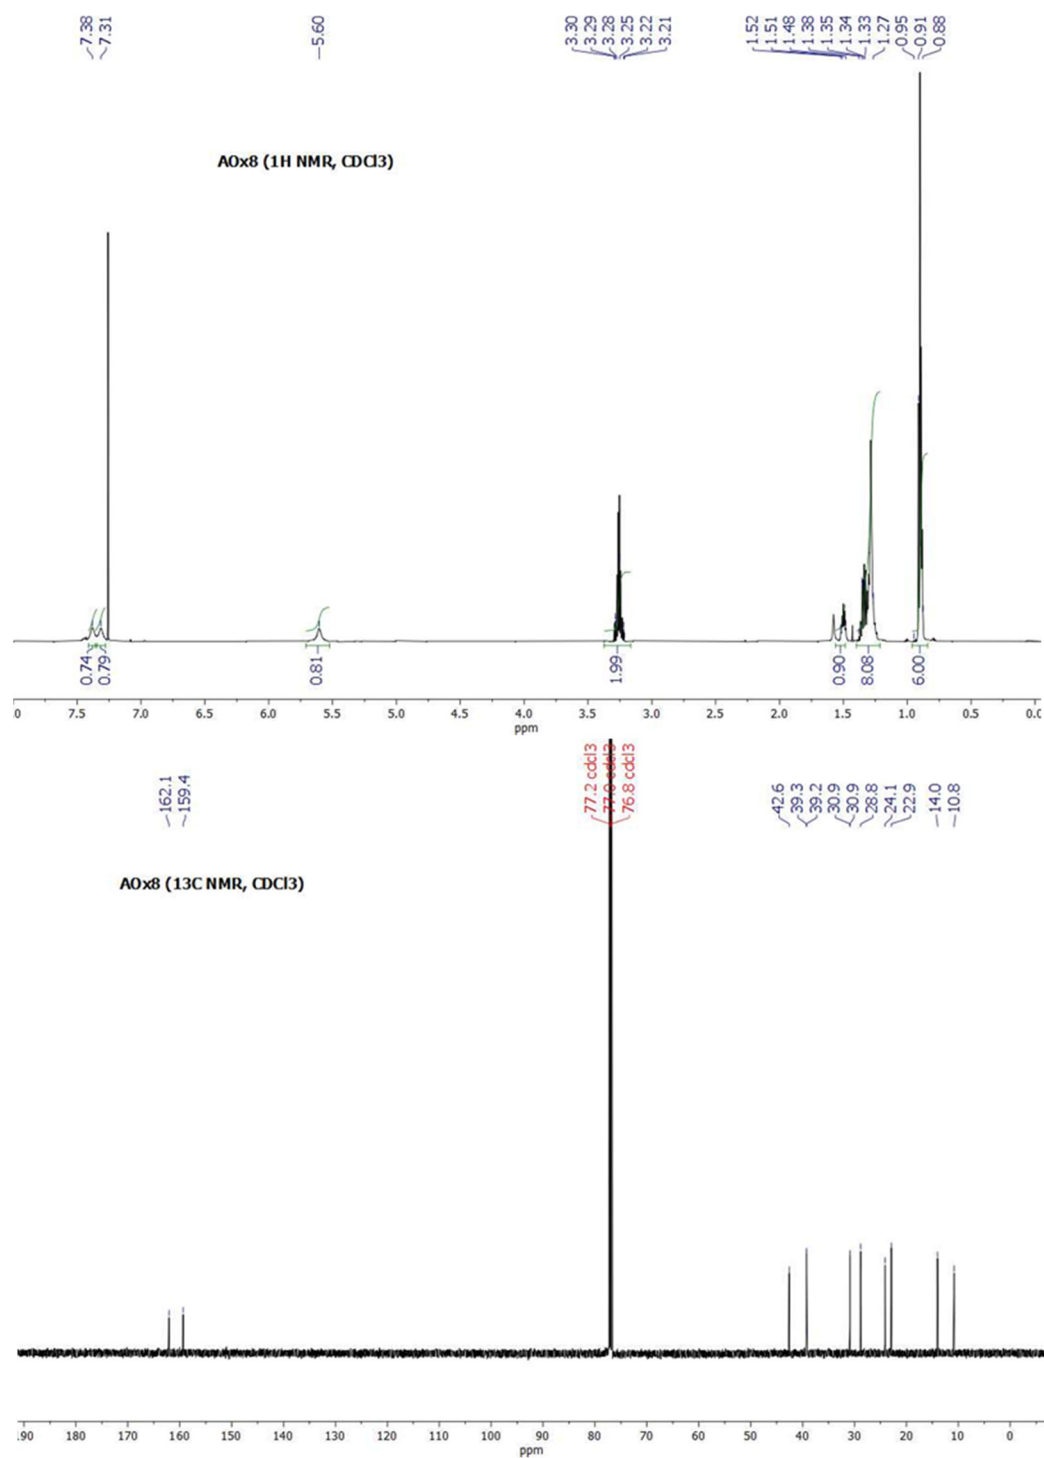

**Figure S1. a.** <sup>1</sup>H and <sup>13</sup>C NMR spectra of AOx8.



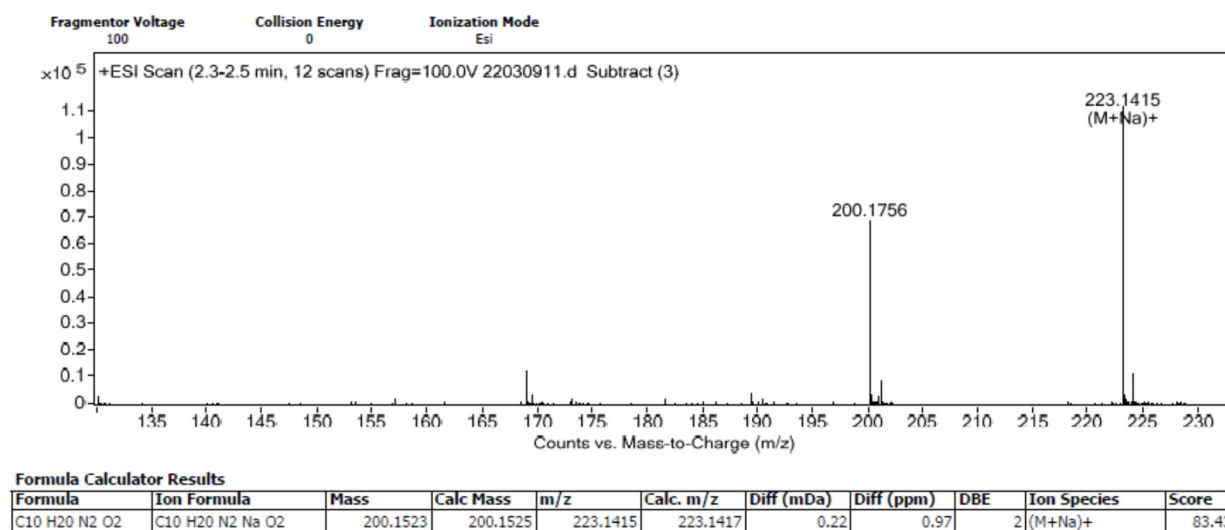

Figure S1. b. High resolution mass spectrum of AOx8.

#### Synthesis of AOx12

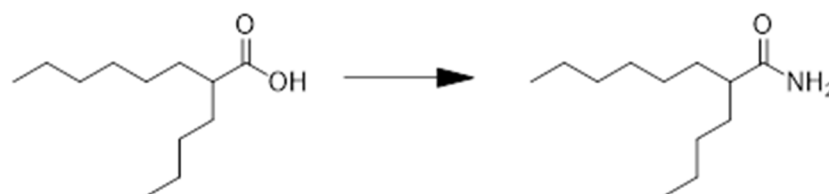

Oxalyl chloride (9.5 g, 75 mmol) was added dropwise to a solution of 2-butyloctanoic acid (10 g, 50 mmol) and anhydrous DMF (0.1 mL) in anhydrous THF (250 mL) at 0 °C. The mixture was then allowed to warm to 23 °C. After 5 h, the excess THF was removed by rotary evaporation and the crude was dried *in vacuo*. Fresh THF (200 mL) was added and the mixture was cooled to 0 °C before adding aqueous NH<sub>4</sub>OH solution (10–30 %, 40 mL) dropwise. The mixture was warmed to 23 °C. After 30 min, the excess THF was removed by rotary evaporation and the resulting white solid was filtered and washed with water and dried *in vacuo* for 18 h to give 2-butyloctanamide as a white solid (9.92 g, 99%).

<sup>1</sup>H NMR (CDCl<sub>3</sub>, 600 MHz) 5.40–5.60 (br m, 2H), 2.08 (m, 1H), 5.6 (br s, 1H), 1.57 (m, 2H), 1.40–1.45 (m, 2H), 1.26–1.32 (m, 12H), 0.85–0.89 (m, 6H).

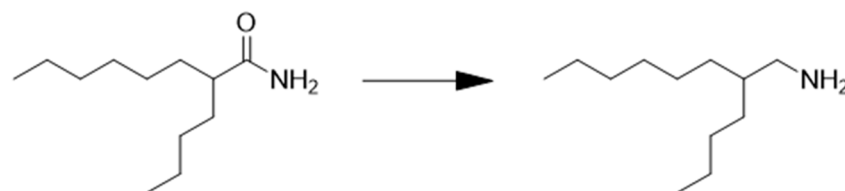

LiAlH<sub>4</sub> (5.42 g, 142.95 mmol) was added in portions over 1 h to a solution of 2-butyloctanoic amide (9.5 g, 51.25 mmol) in anhydrous THF (250 mL) at 0 °C. After 1 h, the reaction was warmed to 23 °C for 2 d and then refluxed for 24 h. The mixture was cooled to 0 °C and water (5.5 mL) was added dropwise over 45 min, followed by a solution of aqueous 0.63 M NaOH solution (22 mL, 13.8 mmol). After stirring at 23 °C for 2 h, the mixture was filtered through celite and the excess THF was removed by rotary evaporation. The resulting aqueous phase was then extracted with DCM (200 mL). The organic layer was separated and washed with water (2×20 mL) and brine (50 mL) before drying over Na<sub>2</sub>SO<sub>4</sub>, filtering, concentrating by rotary evaporation and drying *in vacuo* to afford 2-butyloctylamine as a viscous yellow liquid (8.00 g, 89%).

$^1\text{H}$  NMR ( $\text{CDCl}_3$ , 600 MHz) 2.58 (d, 1H,  $J = 5.4$  Hz), 1.25–1.28 (m, 17H), 0.85–0.89 (m, 6H).

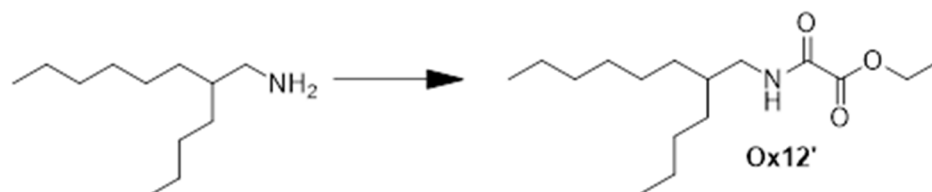

Ethyl chlorooxoacetate (5.74 g, 42.08 mmol) was added to a solution of 2-butyl-octylamine (7.8 g, 42.08 mmol) in anhydrous DCM (200 mL) at  $0^\circ\text{C}$ .  $\text{Et}_3\text{N}$  (6.81 g, 77.38 mmol) was then added and the mixture was slowly warmed to  $23^\circ\text{C}$ . After 3 h, the reaction was washed with water ( $2 \times 25$  mL) followed by brine (25 mL). The organic layer was dried over  $\text{Na}_2\text{SO}_4$ , filtered, and the solvent removed by rotary evaporation to afford **Ox12'** as a yellow oil (9.00 g, 74%).

$^1\text{H}$  NMR ( $\text{CDCl}_3$ , 600 MHz) 7.06 (br s, 1H), 4.32 (q, 2H,  $J = 7.2$  Hz), 3.24 (t, 2H,  $J = 7.2$ ), 1.54 (m, 1H), 1.36 (t, 3H,  $J = 7.2$  Hz), 1.25–1.29 (m, 16H), 0.85–0.89 (m, 6H).

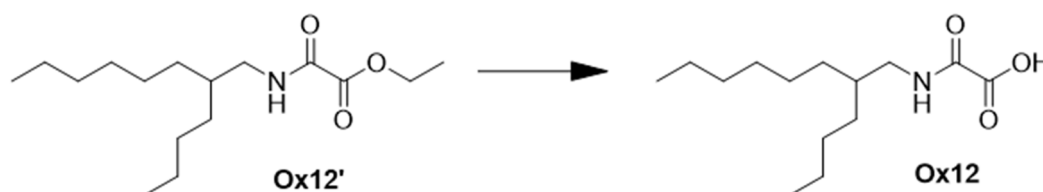

Aqueous 2.5 M  $\text{NaOH}$  (10 mL, 62.62 mmol) was added to a solution of **Ox12'** (9.00 g, 31.31 mmol) in THF (200 mL). The reaction was then stirred at  $23^\circ\text{C}$  for 6 h before 2M  $\text{HCl}$  was added to lower the pH to  $\sim 3$ . The excess THF was then removed by rotary evaporation and the aqueous mixture was then extracted with DCM ( $3 \times 50$  mL). The DCM extracts were combined and dried over  $\text{Na}_2\text{SO}_4$ , filtered and concentrated by rotary evaporation to afford **Ox12** as a white solid (7.91 g, 98%).

$^1\text{H}$  NMR ( $\text{CDCl}_3$ , 600 MHz) 7.26 (br s, 1H), 3.30 (t, 2H,  $J = 7.2$ ), 1.57 (m, 1H), 1.26–1.32 (m, 16H), 0.86–0.90 (m, 6H).

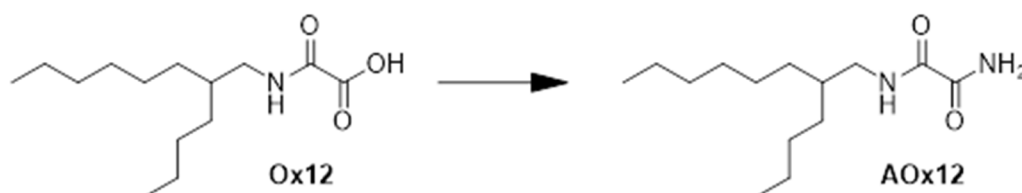

Oxalyl chloride (3.50 mL, 41.39 mmol) was added dropwise to a solution of **Ox12** (5.90 g, 23.00 mmol) in anhydrous THF (150 mL) and anhydrous DMF (0.1 mL) at  $0^\circ\text{C}$ . The reaction was then slowly warmed to  $23^\circ\text{C}$ . After 4 h, the excess THF was removed by rotary evaporation and the crude residue was dried *in vacuo*. Fresh anhydrous THF (200 mL) was then added and the mixture was cooled to  $0^\circ\text{C}$  before adding aqueous  $\text{NH}_4\text{OH}$  (10–30 %, 40 mL) dropwise. The mixture was then warmed to  $23^\circ\text{C}$  and allowed to stir for an additional 30 min., before the excess THF was removed by rotary evaporation. The white solid residue was dispersed in deionized water, filtered and washed with deionized water before drying *in vacuo* for 18 h to afford the compound **AOx12** as a white solid (5.10 g, 86%).

$^1\text{H}$  NMR ( $\text{CDCl}_3$ , 600 MHz)  $\delta$  7.38 (br s, 1H), 7.33 (br s, 1H), 5.65 (br s, 1H), 3.27 (t, 2H,  $J = 6$  Hz), 1.56 (m, 1H), 1.26–1.31 (m, 16H), 0.86–0.89 (m, 6H).  $^{13}\text{C}$  NMR ( $\text{CDCl}_3$ , 150 MHz)  $\delta$  162.7, 160.7, 42.9, 37.4, 31.7, 31.6, 31.2, 29.5, 28.6, 26.3, 22.9, 22.5, 14.4. HRMS (ESI,  $\text{M}^+$ )  $m/z$  341.3402 (calcd for  $\text{C}_{24}\text{H}_{47}\text{N}_2\text{O}_2$ ).

for  $C_{14}H_{28}N_2O_3$  279.2043 ( $M+Na$ )<sup>+</sup>, 279.2044 ( $M+Na$ )<sup>+</sup> found. FT-IR (KBr)  $\nu$  (cm<sup>-1</sup>) 3374, 3309, 3192, 2922, 2854, 1653, 1603, 1546, 1447, 1410, 1376, 1261, 1148.

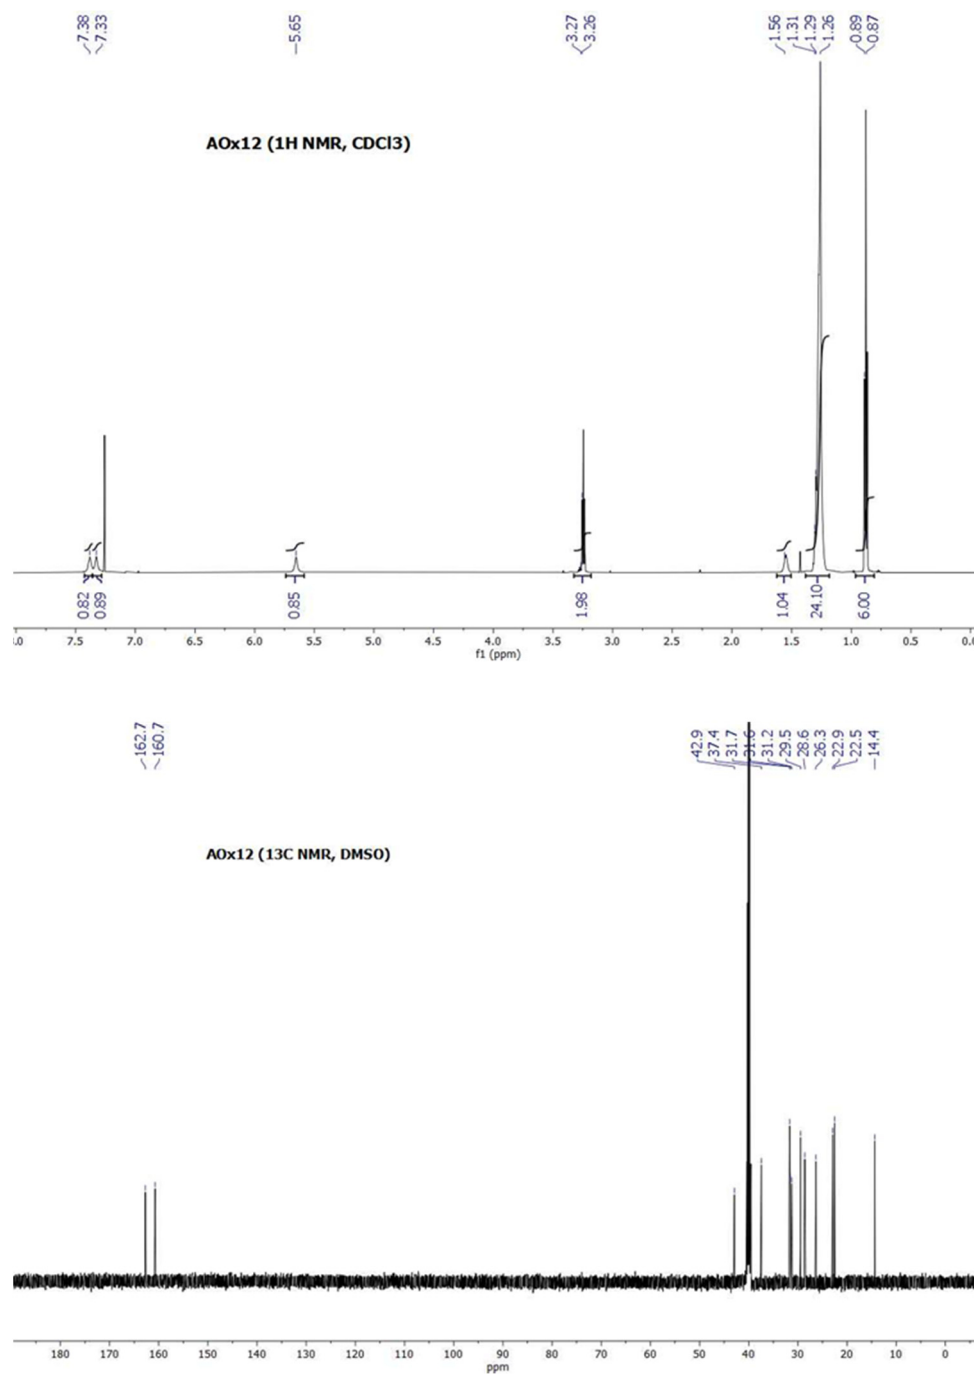

Figure S2. a. <sup>1</sup>H and <sup>13</sup>C NMR of AOx12.

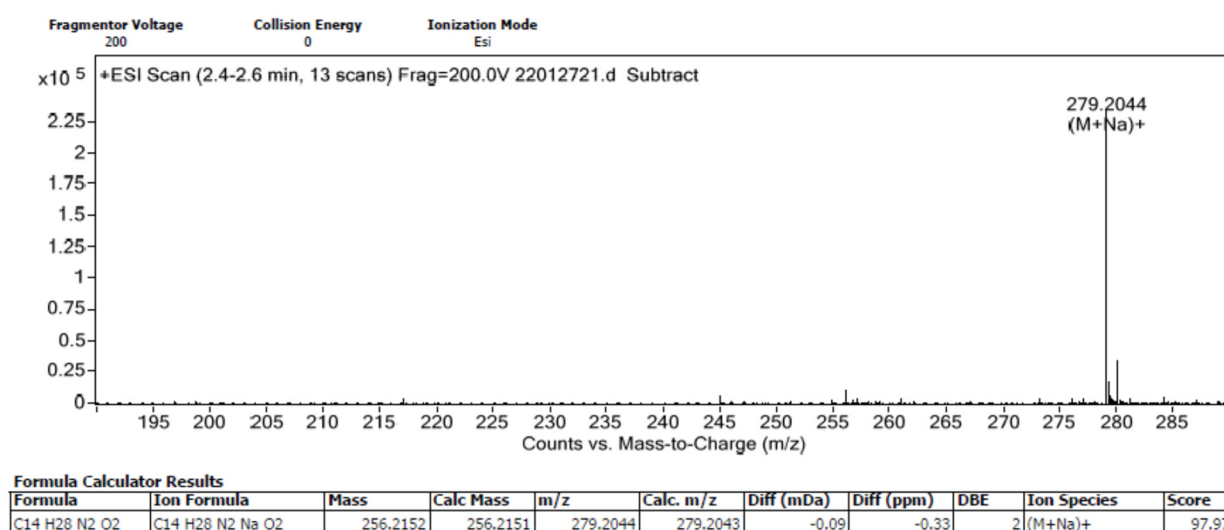

Figure S2. b. High resolution mass spectrum of AOx12.

#### Synthesis of AOx16

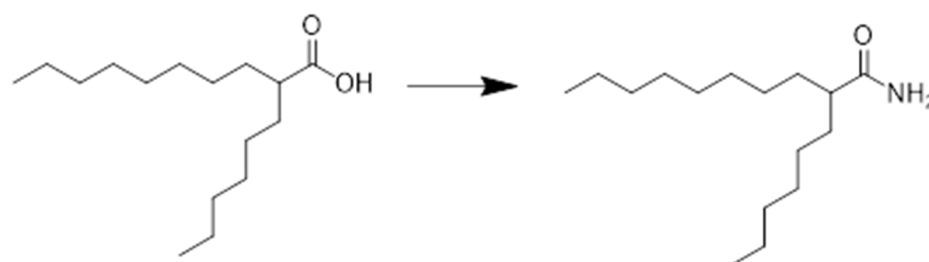

Oxalyl chloride (7.49 g, 59.0 mmol) was added dropwise to a solution of 2-hexyldecanoic acid (10 g, 38.99 mmol) and anhydrous DMF (0.1 mL) in anhydrous THF (250 mL) at 0°C. The mixture was then allowed to warm to 23°C. After 4 h, the excess THF was removed by rotary evaporation and the crude was dried *in vacuo*. Fresh THF (200 mL) was added and the mixture was cooled to 0°C before adding aqueous  $\text{NH}_4\text{OH}$  solution (10–30%, 40 mL) dropwise. The mixture was warmed to 23°C. After 30 min, the excess THF was removed by rotary evaporation and the resulting white solid was filtered and washed with water and dried *in vacuo* for 18 h to give 2-butyloctanamide as a white solid (9.95 g, 99%).

$^1\text{H}$  NMR ( $\text{CDCl}_3$ , 600 MHz) 5.43 (br s, 2H), 2.08 (d, 1H,  $J = 5.4$ ), 1.57 (m, 2H), 1.43 (m, 2H), 1.26–1.32 (m, 20H), 0.85–0.89 (m, 6H).

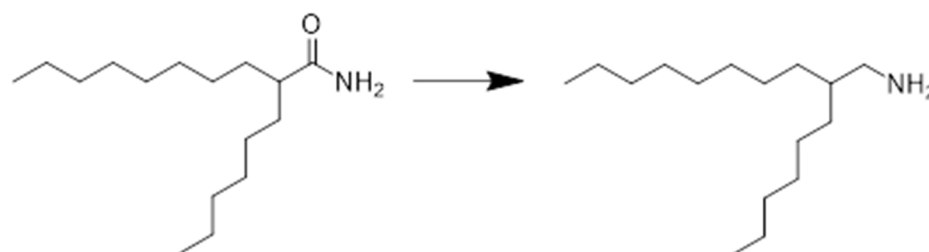

$\text{LiAlH}_4$  (5.32 g, 140.25 mmol) was added in portions over 1 h to a solution of 2-hexyldecanamide (9.67 g, 37.88 mmol) in anhydrous THF (250 mL) at 0°C. After 1 h, the reaction was warmed to 23°C for 2 d and then refluxed for 24 h. The mixture was cooled to 0°C and water (5.5 mL) was added dropwise over 45 min, followed by a solution of aqueous 0.63 M  $\text{NaOH}$  solution (22 mL, 13.8 mmol). After stirring at 23°C for 2 h, the mixture was filtered through celite and the excess THF was removed by rotary evaporation. The

resulting aqueous phase was then extracted with DCM (200 mL). The organic layer was separated and washed with water (2×20 mL) and brine (50 mL) before drying over Na<sub>2</sub>SO<sub>4</sub>, filtering, concentrating by rotary evaporation and drying *in vacuo* to afford 2-hexyldecylamine as a viscous yellow liquid (8.05 g, 88%).

<sup>1</sup>H NMR (CDCl<sub>3</sub>, 600 MHz) 2.58 (d, 1H, *J* = 5.4 Hz), 1.25–1.30 (m, 25H), 0.86–0.88 (m, 6H).

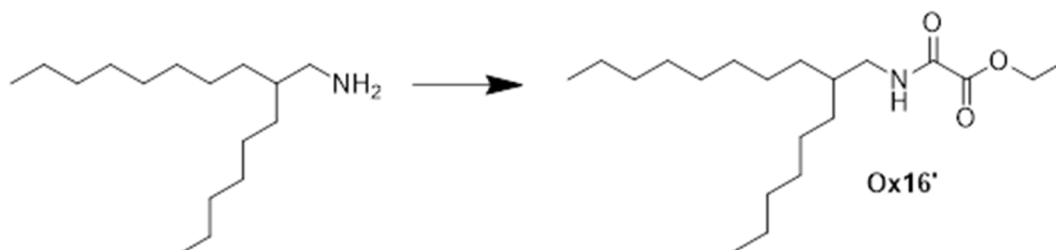

Ethyl chlorooxoacetate (4.98 g, 36.44 mmol) was added to a solution of 2-hexyldecylamine (8.00 g, 33.13 mmol) in anhydrous DCM (200 mL) at 0°C. Et<sub>3</sub>N (6.70 g, 66.26 mmol) was then added and the mixture was slowly warmed to 23°C. After 3 h, the reaction was washed with water (2 × 25 mL) followed by brine (25 mL). The organic layer was dried over Na<sub>2</sub>SO<sub>4</sub>, filtered, and the solvent removed by rotary evaporation to afford **Ox16'** as a yellow oil (7.9 g, 70%).

<sup>1</sup>H NMR (CDCl<sub>3</sub>, 600 MHz) 7.05 (br s, 1H), 4.33 (q, 2H, *J* = 7.2 Hz), 3.26 (t, 2H, *J* = 6 Hz), 1.54 (m, 1H), 1.38 (t, 3H, *J* = 7.2 Hz), 1.23–1.29 (m, 24H), 0.85–0.89 (m, 6H).

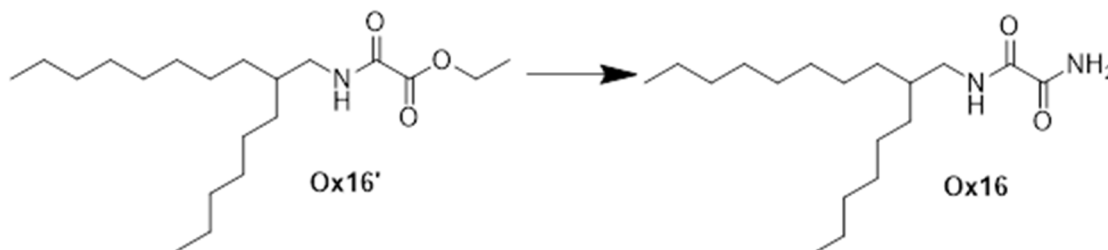

Aqueous 2.5M NaOH (18 mL, 45.67 mmol) was added to a solution of **Ox16'** (7.80 g, 22.83 mmol) in THF (200 mL). After 1 h, 2M HCl was added to lower the pH ~3. The excess THF was removed by rotary evaporation and resulting aqueous phase was extracted with DCM (3×50 mL). The combined extracts were then dried over Na<sub>2</sub>SO<sub>4</sub>, filtered and concentrated *in vacuo* to afford a white solid. The solid was then dissolved in fresh anhydrous THF (200 mL) and anhydrous DMF (0.1 mL) and the mixture was then cooled at 0°C before adding oxalyl chloride (3.5 mL, 41.09 mmol) dropwise. The reaction was warmed to 23°C. After stirring for 4 h, the excess THF was removed by rotary evaporation and the crude was dried *in vacuo*. The crude solid was then dissolved in fresh anhydrous THF (250 mL) and cooled at 0°C before adding aqueous NH<sub>4</sub>OH (10–30%, 40 mL). The mixture was then allowed to stir at 23°C for 2 h. The excess THF was then removed by rotary evaporation to give a white suspension that was filtered and washed with deionized water and dried *in vacuo* for 18 h to afford the compound **AOx16** as a white solid (6.70 g, 98%).

<sup>1</sup>H NMR (CDCl<sub>3</sub>, 600 MHz) δ 7.38 (br s, 1H), 7.33 (br s, 1H), 5.65 (br s, 1H), 3.24 (t, 2H, *J* = 6 Hz), 1.56 (m, 1H), 1.25–1.30 (m, 24H), 0.87 (t, 6H, *J* = 6.6 Hz). <sup>13</sup>C NMR (CDCl<sub>3</sub>, 150 MHz) δ 162.1, 159.3, 43.0, 37.8, 31.8, 31.7, 29.9, 29.5, 29.3, 26.6, 26.5, 22.6, 14.1. HRMS (ESI, M<sup>+</sup>) calcd for C<sub>18</sub>H<sub>36</sub>N<sub>2</sub>O<sub>2</sub> 335.2669 (M+Na)<sup>+</sup>, 335.2670 (M+Na)<sup>+</sup> found. FT-IR (KBr) ν (cm<sup>-1</sup>) 3383, 3310, 3209, 2920, 2851, 1651, 1603, 1544, 1445, 1411, 1376, 1254, 1110.

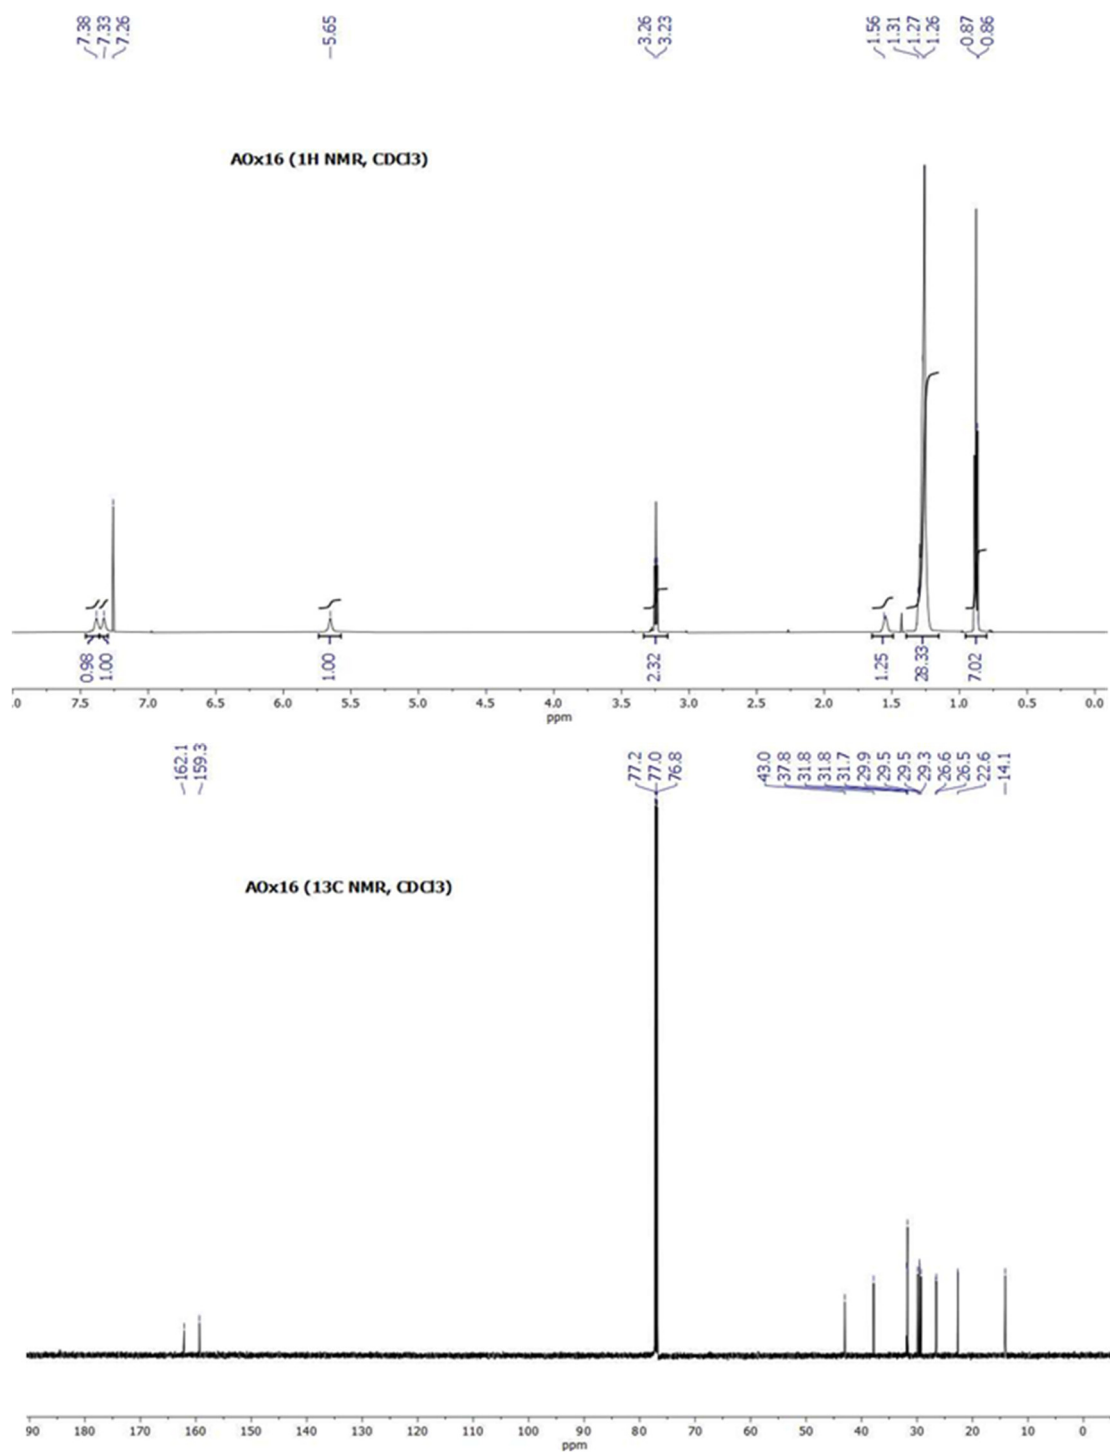

Figure S3. a. <sup>1</sup>H and <sup>13</sup>C NMR of AOx16.

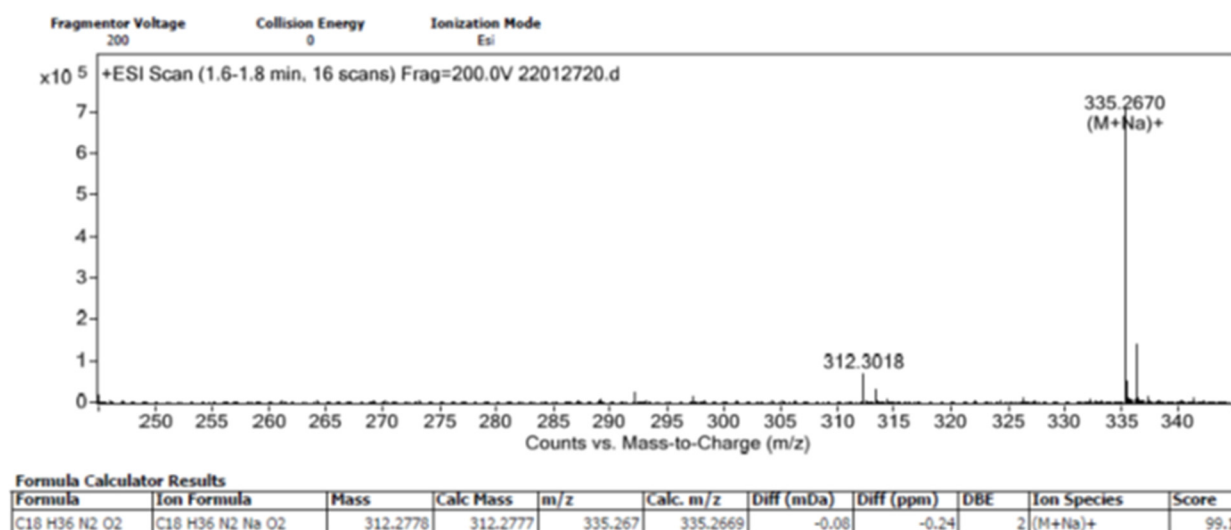

Figure S3. b. High resolution mass spectrum of AOx16.

## Synthesis of AOx24

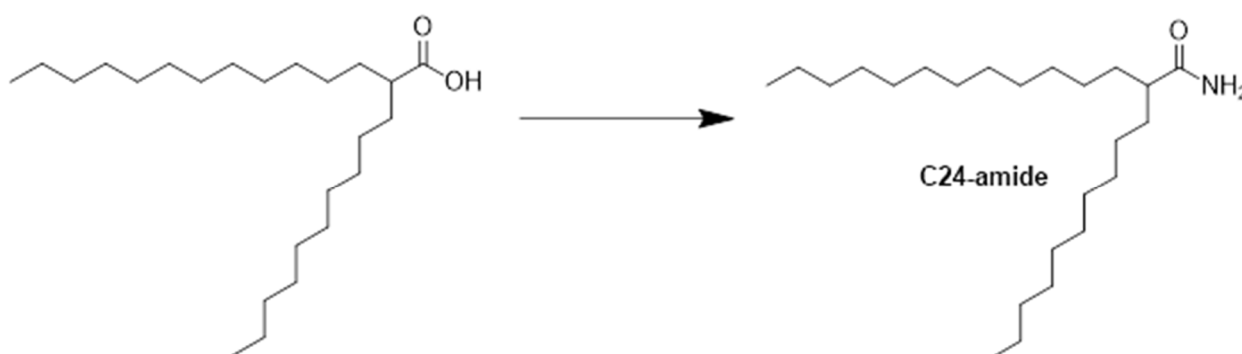

Oxalyl chloride (5.17 g, 40.77 mmol) was added dropwise to a solution of 2-decyltetradecanoic acid (10.00 g, 27.17 mmol) and anhydrous DMF (0.1 mL) in anhydrous THF (250 mL) at 0°C. The mixture was then allowed to warm to 23°C. After 18 h, the excess THF was removed by rotary evaporation and the crude was dried *in vacuo*. Fresh THF (200 mL) was added and the mixture was cooled to 0°C before adding aqueous NH<sub>4</sub>OH solution (10–30%, 40 mL) dropwise to form a white precipitate. The mixture was warmed to 23°C. After 60 min, the resulting white solid was filtered and washed with water and THF before drying *in vacuo* for 18 h to give **C24-amide** as a white solid (10.10 g, 99%).

<sup>1</sup>H NMR (600 MHz, acetone-*d*<sub>6</sub>) 6.69 (s, 1H), 6.01 (s, 1H), 2.19 (br s, 1H), 1.93 (br s, 2H), 1.54 (m, 2H), 1.27 (m, 34H), 0.87 (t, 6H).

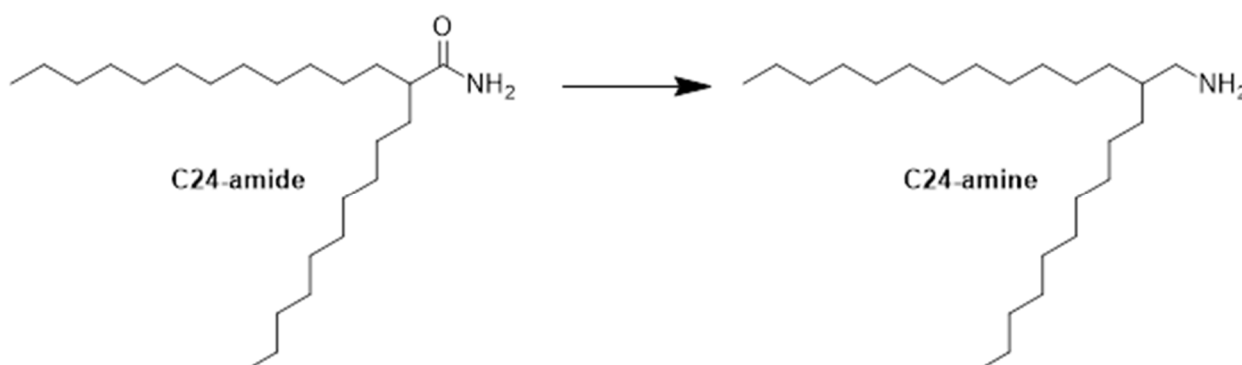

$\text{LiAlH}_4$  (3.09 g, 81.51 mmol) was added in portions over 1 h to a suspension of **C-24 amide** (10.00 g, 27.17 mmol) in anhydrous THF (200 mL) at 0°C. The mixture was allowed to stir at 23°C for 30 min. before heating to reflux. After 24 h, the mixture was cooled to 0°C and water (12.1 mL) was added dropwise followed by 2.5 M aqueous NaOH (3.1 mL). After 1 h, the mixture was slowly warmed to 23°C and stirred for an additional 3 h before filtered through Celite. The filtrate was then concentrated by rotary evaporation to afford **C-24 amine** as colorless oil (8.13 g, 85%).

$^1\text{H}$  NMR (600 MHz,  $\text{CDCl}_3$ ) 2.57 (d, 1H,  $J = 5.4$  Hz), 1.24–1.27 (m, 41H), 0.86 (t, 6H,  $J = 7.2$  Hz).

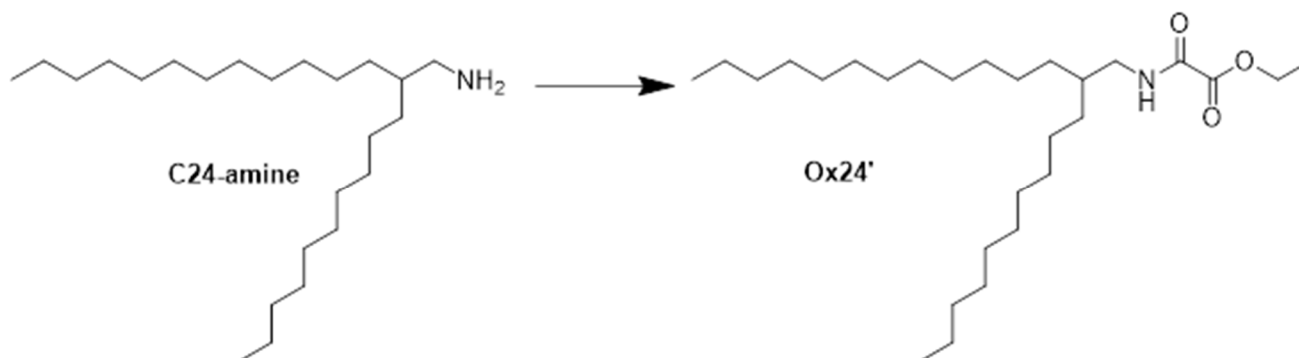

Ethyl chlorooxoacetate (1.08 g, 7.91 mmol) was added to a solution of 2-decyltetradecylamine (2.00 g, 6.58 mmol) in anhydrous DCM (50 mL) at 0°C.  $\text{Et}_3\text{N}$  (1.32 g, 13.16 mmol) was then added and the mixture was slowly warmed to 23°C. After 2 h, the excess DCM was removed by rotary evaporation. Ethyl acetate (50 mL) was added to the crude residue and the mixture was then washed with water (20 mL) and brine (20 mL). The ethyl acetate layer was dried over  $\text{Na}_2\text{SO}_4$ , filtered, and concentrated by rotary evaporation to afford **Ox24'** as a yellow oil (2.95 g, 99%).

$^1\text{H}$  NMR (600 MHz,  $\text{CDCl}_3$ ) 7.10 (br s, 1H), 4.33 (q, 2H), 3.25 (t, 2H), 1.56 (m, 1H), 1.27 (t, 3H), 1.22–1.26 (m, 40H), 0.86 (t, 6H).

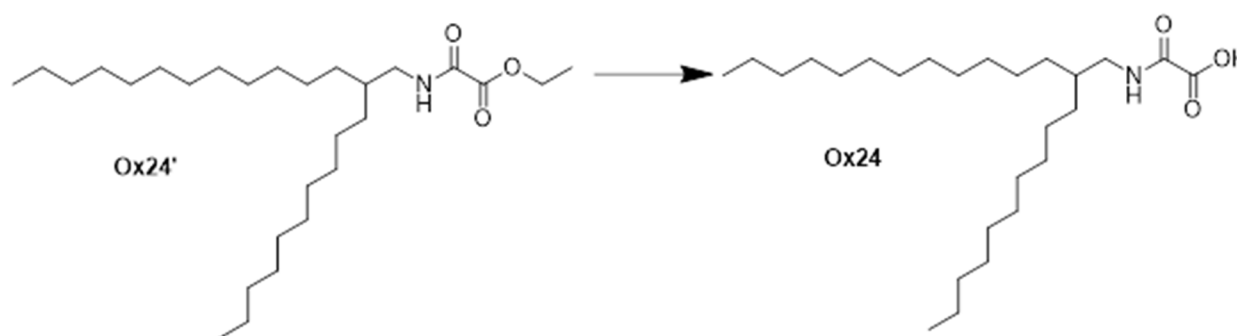

Aqueous 2.5M NaOH (0.52 g, 13 mmol) was added to a solution of **Ox24'** (2.90 g, 6.5 mmol) in THF (200 mL). After 1 h, 2M HCl was added until pH ~3. THF was removed by rotary evaporation and a white precipitate was formed, which was filtered, washed with deionized water and ethyl acetate, then dried *in vacuo* for 18 h to afford the **Ox24** as a white solid (2.72 g, 99%).

$^1\text{H}$  NMR (600 MHz,  $\text{CDCl}_3$ ) 3.28 (t, 2H), 1.58 (m, 1H), 1.27 (t, 3H), 1.23–1.28 (m, 40H), 0.86 (t, 6H)



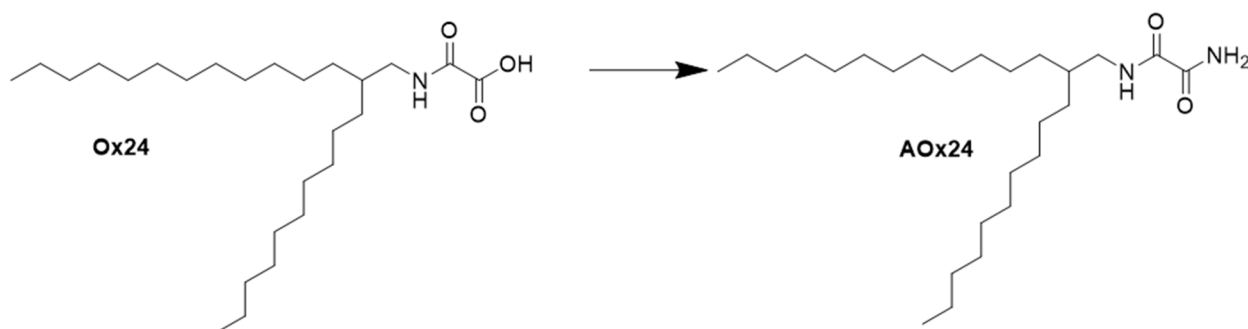

Oxalyl chloride (1.13 g, 8.94 mmol) was added dropwise to a solution of **Ox24** (1.90 g, 4.47 mmol) in anhydrous THF (100 mL) and anhydrous DMF (0.1 mL) at 0°C. The reaction was then slowly warmed to 23°C. After 4 h, the excess THF was removed by rotary evaporation and the crude residue was dried *in vacuo*. Fresh anhydrous THF (100 mL) was then added and the mixture was cooled to 0°C before adding aqueous  $\text{NH}_4\text{OH}$  (10–30%, 10 mL) dropwise. The mixture was then warmed to 23°C and allowed to stir for an additional 30 min, before the excess THF was removed by rotary evaporation. The white solid residue was dispersed in deionized water, filtered, washed with deionized water and then hexanes and diethyl ether before drying *in vacuo* for 18 h to afford the compound **AOx24** as a white solid (1.58 g, 83 %).

$^1\text{H}$  NMR (600 MHz,  $\text{CDCl}_3$ )  $\delta$  7.36 (br s, 1H), 7.30 (br s, 1H), 5.58 (br s, 1H), 3.24 (t, 2H,  $J = 7.2$  Hz) 1.55 (m, 1H), 1.26–1.31 (m, 40H), 0.86 (t, 6H,  $J = 7.2$  Hz).  $^{13}\text{C}$  NMR (150 MHz,  $\text{CDCl}_3$ )  $\delta$  162.0, 159.3, 43.0, 37.8, 31.9 (x2), 31.7, 29.9, 29.7, 29.6 (x5), 29.3 (x2), 26.6, 22.7, 14.1. HRMS (ESI,  $\text{M}^+$ ) calcd for  $\text{C}_{26}\text{H}_{52}\text{N}_2\text{O}_2$  447.3921 ( $\text{M}+\text{Na}$ ) $^+$ , 447.3922 ( $\text{M}+\text{Na}$ ) $^+$  found. Elemental analysis: calculated (%) for  $\text{C}_{26}\text{H}_{52}\text{N}_2\text{O}_2$ , C: 73.5, H: 12.3, N: 6.6 found (%), C: 73.4, H: 12.4, N: 6.6. FT-IR (KBr)  $\nu$  ( $\text{cm}^{-1}$ ) 3384, 3309, 3213, 2917, 2849, 1651, 1601, 1544, 1410, 1376, 1255, 1109.

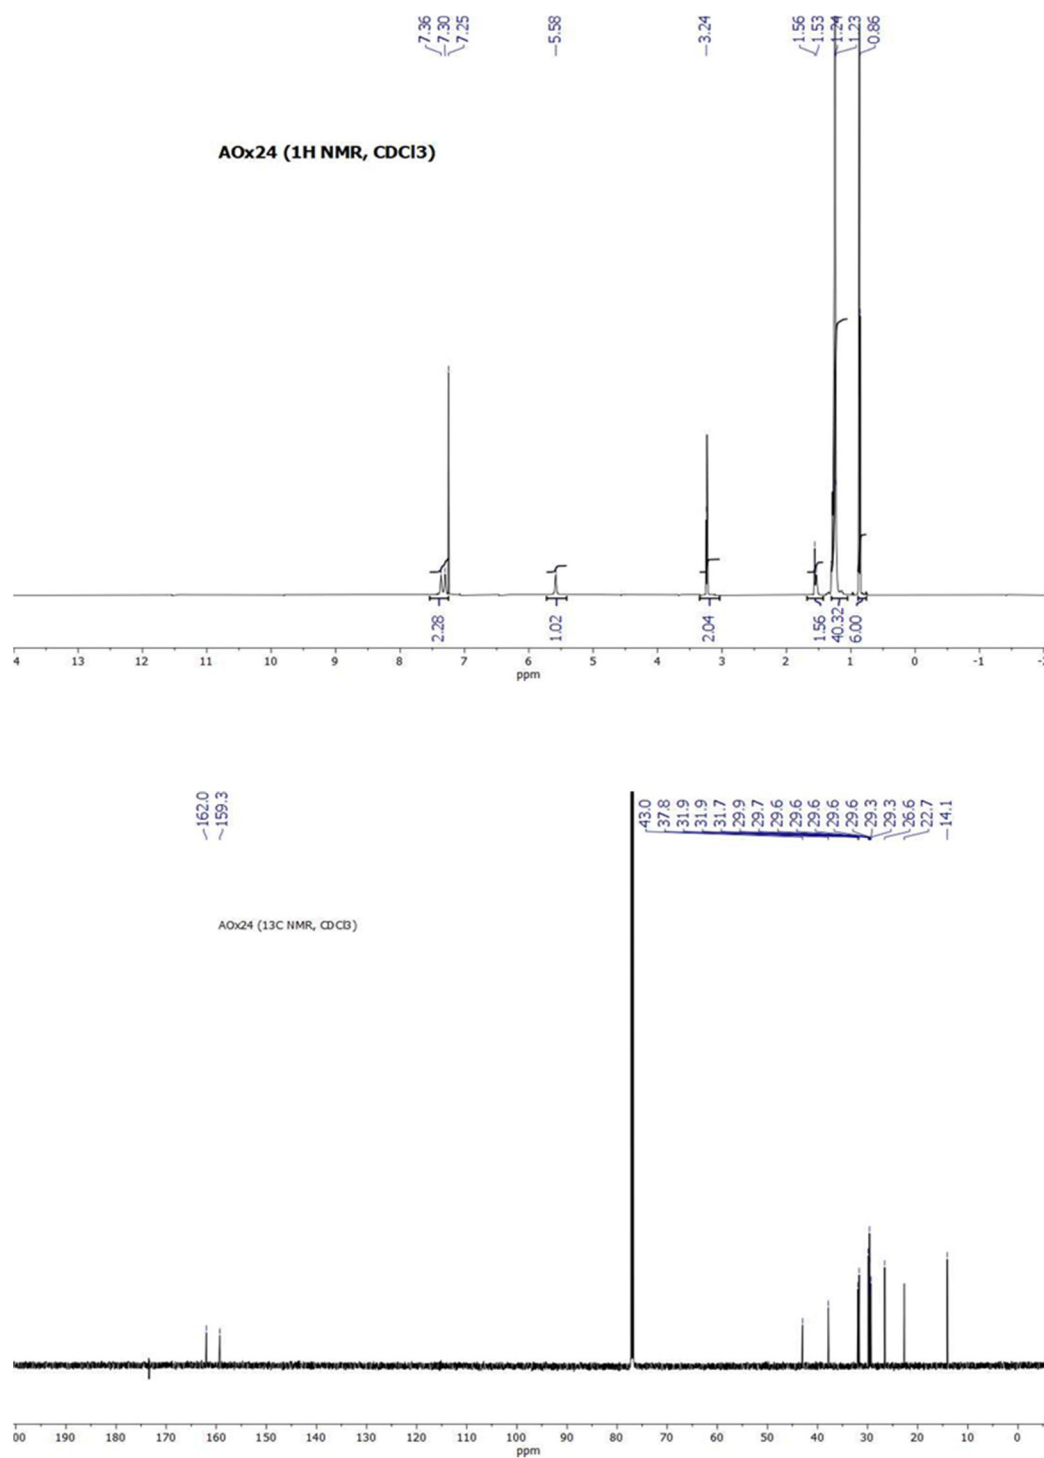

**Figure S4. a.** <sup>1</sup>H and <sup>13</sup>C NMR of AOx24.

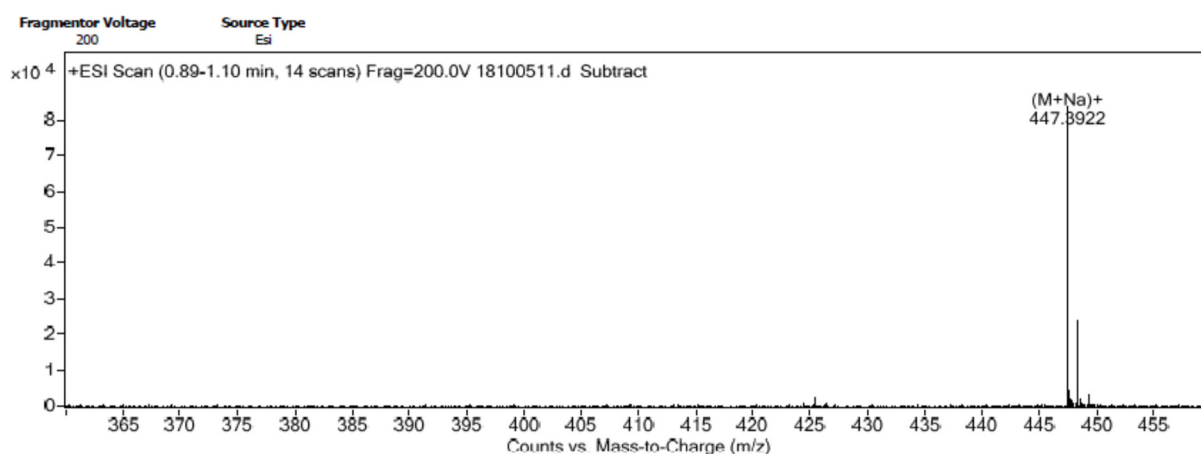

Formula Calculator Results

| Formula       | Ion Species      | Mass    | Calc. Mass | m/z      | Calc. m/z | Diff (mDa) | Diff (ppm) | DBE | Ion     | Score |
|---------------|------------------|---------|------------|----------|-----------|------------|------------|-----|---------|-------|
| C26 H52 N2 O2 | C26 H52 N2 Na O2 | 424.403 | 424.4029   | 447.3922 | 447.3921  | -0.12      | -0.27      | 2   | (M+Na)+ | 88.78 |

Figure S4. b. High resolution mass spectrum of AOx24.

## Additional Data

Table S1. Gelator test data for alkylated oxalamides.

| Solvent                                                                                                                                                                                                                                                                                                                                                                                                          | AOx8      | AOx12     | AOx16      | AOx24      |
|------------------------------------------------------------------------------------------------------------------------------------------------------------------------------------------------------------------------------------------------------------------------------------------------------------------------------------------------------------------------------------------------------------------|-----------|-----------|------------|------------|
|  <p>Copyright: © 2022 by the authors. Licensee MDPI, Basel, Switzerland. This article is an open access article distributed under the terms and conditions of the Creative Commons Attribution (CC BY) license (<a href="https://creativecommons.org/licenses/by/4.0/">https://creativecommons.org/licenses/by/4.0/</a>).</p> |           |           |            |            |
| Acetone                                                                                                                                                                                                                                                                                                                                                                                                          | OG (2.2)  | OG (2.2)  | P          | OG (2.4)   |
| Acetonitrile                                                                                                                                                                                                                                                                                                                                                                                                     | OG (2.0)  | OG (2.0)  | OG (0.8)   | OG (0.3)   |
| Benzyl alcohol                                                                                                                                                                                                                                                                                                                                                                                                   | OG (2.3)  | OG (2.3)  | S          | TG (0.8)   |
| nButanol                                                                                                                                                                                                                                                                                                                                                                                                         | OG (1.0)  | OG (1.9)  | OG (2.8)   | OG (2.0)   |
| Castor oil                                                                                                                                                                                                                                                                                                                                                                                                       | TG (0.8)  | CG (0.8)  | OG (0.7)   | CG (0.7)   |
| Chloroform                                                                                                                                                                                                                                                                                                                                                                                                       | OG (3.3)  | S         | S          | S          |
| Cinnamaldehyde                                                                                                                                                                                                                                                                                                                                                                                                   | OG (2.6)  | OG (0.6)  | OG (2.6)   | OG (1.2)   |
| Corn oil                                                                                                                                                                                                                                                                                                                                                                                                         | TG (<0.4) | TG (<0.4) | CG (<0.4)  | CG (<0.4)  |
| Cyclohexane                                                                                                                                                                                                                                                                                                                                                                                                      | OG (2.0)  | TG (<0.2) | CG (<0.1)  | TG (0.2)   |
| 1,4-Dioxane                                                                                                                                                                                                                                                                                                                                                                                                      | S         | S         | S          | S          |
| Dodecane                                                                                                                                                                                                                                                                                                                                                                                                         | TG (0.8)  | OG (<0.1) | TG (<0.1)  | TG (<0.1)  |
| DMF                                                                                                                                                                                                                                                                                                                                                                                                              | S         | OG (2.6)  | OG (2.7)   | OG (2.5)   |
| DMSO                                                                                                                                                                                                                                                                                                                                                                                                             | S         | S         | S          | OG (2.5)   |
| Ethanolamine                                                                                                                                                                                                                                                                                                                                                                                                     | TG (0.8)  | OG (1.9)  | TG (0.5)   | OG (0.1)   |
| Ethyl acetate                                                                                                                                                                                                                                                                                                                                                                                                    | OG (2.5)  | OG (2.5)  | P          | OG (2.5)   |
| Hexanes                                                                                                                                                                                                                                                                                                                                                                                                          | OG (2.0)  | OG (0.2)  | TG (<0.1)  | TG (0.1)   |
| Hexadecane                                                                                                                                                                                                                                                                                                                                                                                                       | TG (0.7)* | OG (0.05) | TG (<0.05) | TG (<0.05) |
| Isopropyl Myristate                                                                                                                                                                                                                                                                                                                                                                                              | OG (<1.0) | OG (<1.0) | TG (<1.0)  | OG (<1.0)  |
| Lactic acid                                                                                                                                                                                                                                                                                                                                                                                                      | S         | OG (0.8)  | OG (<0.4)  | TG (0.1)   |
| MeOH                                                                                                                                                                                                                                                                                                                                                                                                             | OG (1.8)  | OG (3.0)  | OG (3.0)   | OG (0.3)   |
| Methyl ethyl ketone                                                                                                                                                                                                                                                                                                                                                                                              | S         | S         | S          | S          |

|                     |           |           |           |           |
|---------------------|-----------|-----------|-----------|-----------|
| Oleic acid          | S         | S         | S         | S         |
| Olive oil           | TG (0.4)  | TG (<0.4) | CG (<0.4) | TG (<0.4) |
| Propylene carbonate | OG (3.0)  | OG (0.8)  | OG (0.3)  | OG (0.1)  |
| Propylene glycol    | OG (2.5)  | OG (0.8)  | TG (0.4)  | OG (0.1)  |
| Sesame oil          | TG (<0.4) | TG (<0.4) | CG (<0.4) | TG (<0.4) |
| Soybean oil         | TG (<0.4) | TG (<0.4) | CG (<0.4) | TG (<0.4) |
| THF                 | S         | S         | S         | S         |
| Toluene             | OG (2.0)  | OG (1.9)  | CG (0.5)  | CG (0.5)  |
| Water               | I         | I         | I         | I         |
| Xylenes             | OG (2.4)  | OG (2.2)  | CG (0.5)  | CG (0.5)  |

OG = opaque gel. S = solution. P = precipitate. TG = turbid gel. PG = partial gel. CG = clear gel. Minimum gel concentrations (MGCs) are shown in parenthesis in wt%/v. \*unstable after several days. \* = underwent syneresis over several days.

**Table S2.** Hansen Solubility Parameters (HSPs) and outcomes of solubility/gelation tests with alkylated oxalamides.

| Solvent             | $\delta_p$ | $\delta_h$ | $2\delta_d$ | AOx8  |         | AOx12 |         | AOx16 |         | AOx24 |         |
|---------------------|------------|------------|-------------|-------|---------|-------|---------|-------|---------|-------|---------|
|                     |            |            |             | 1 wt% | 3.5 wt% |
| Acetone             | 10.4       | 7          | 31          | S     | G       | PG    | G       | S     | P       | S     | G       |
| Acetonitrile        | 18         | 6.1        | 30.6        | PG    | G       | PG    | G       | G     | G       | G     | G       |
| Benzyl alcohol      | 6.3        | 13.7       | 36.8        | S     | G       | S     | G       | S     | S       | G     | G       |
| Butanol             | 5.7        | 15.8       | 32          | G     | G       | S     | G       | S     | G       | S     | G       |
| Castor oil          | 4.6        | 12         | 31.8        | G     | G       | G     | G       | G     | G       | G     | G       |
| Chloroform          | 3.1        | 5.7        | 35.6        | S     | G       | S     | S       | S     | S       | S     | S       |
| Cinnamaldehyde      | 12.4       | 6.2        | 38          | S     | G       | G     | G       | S     | G       | PG    | G       |
| Cyclohexane         | 0          | 0.2        | 33.6        | PG    | G       | G     | G       | G     | G       | G     | G       |
| Dimethyl formamide  | 13.7       | 11.3       | 34.8        | S     | S       | S     | G       | S     | G       | S     | G       |
| Dimethylsulfoxide   | 16.4       | 10.2       | 36.8        | S     | S       | S     | S       | S     | S       | S     | G       |
| Dioxane             | 1.8        | 9          | 35          | S     | S       | S     | S       | S     | S       | S     | S       |
| Dodecane            | 0          | 0          | 32          | G     | G       | G     | G       | G     | G       | G     | G       |
| Ethanolamine        | 15.5       | 21         | 34          | G     | G       | PG    | G       | G     | G       | G     | G       |
| Ethyl acetate       | 5.3        | 7.2        | 31.6        | S     | G       | PG    | G       | P     | P       | S     | G       |
| Hexadecane          | 0          | 0          | 32.6        | G     | G       | G     | G       | G     | G       | G     | G       |
| Hexane              | 0          | 0          | 29.8        | PG    | G       | G     | G       | G     | G       | G     | G       |
| Lactic acid         | 8.3        | 28.4       | 34          | S     | S       | G     | G       | G     | G       | G     | G       |
| MeOH                | 12.3       | 22.3       | 29.4        | S     | G       | S     | G       | S     | G       | G     | G       |
| Oleic acid          | 2.8        | 6.2        | 32          | S     | S       | S     | S       | S     | S       | S     | S       |
| Olive oil           | 1.2        | 5.4        | 33          | G     | G       | G     | G       | G     | G       | G     | G       |
| Propylene carbonate | 18         | 4.1        | 40          | PG    | G       | G     | G       | G     | G       | G     | G       |
| Propylene glycol    | 10.4       | 21.3       | 33.6        | S     | G       | G     | G       | G     | G       | G     | G       |
| Sesame oil          | 3.5        | 3.09       | 35.38       | G     | G       | G     | G       | G     | G       | G     | G       |
| Soybean oil         | 2          | 2.7        | 33          | G     | G       | G     | G       | G     | G       | G     | G       |
| THF                 | 5.7        | 8          | 33.6        | S     | S       | S     | S       | S     | S       | S     | S       |
| Toluene             | 1.4        | 2          | 36          | PG    | G       | PG    | G       | G     | G       | G     | G       |
| water               | 16         | 42.3       | 31          | I     | I       | I     | I       | I     | I       | I     | I       |
| Xylenes             | 1          | 3.1        | 35.2        | PG    | G       | I     | G       | G     | G       | G     | G       |

Gel (G), Soluble (S), Insoluble (I) for insoluble and precipitates, and Partial Gels (PG).  $\delta_p$ ,  $\delta_h$  and  $2\delta_d$  are in MPa<sup>1/2</sup>.

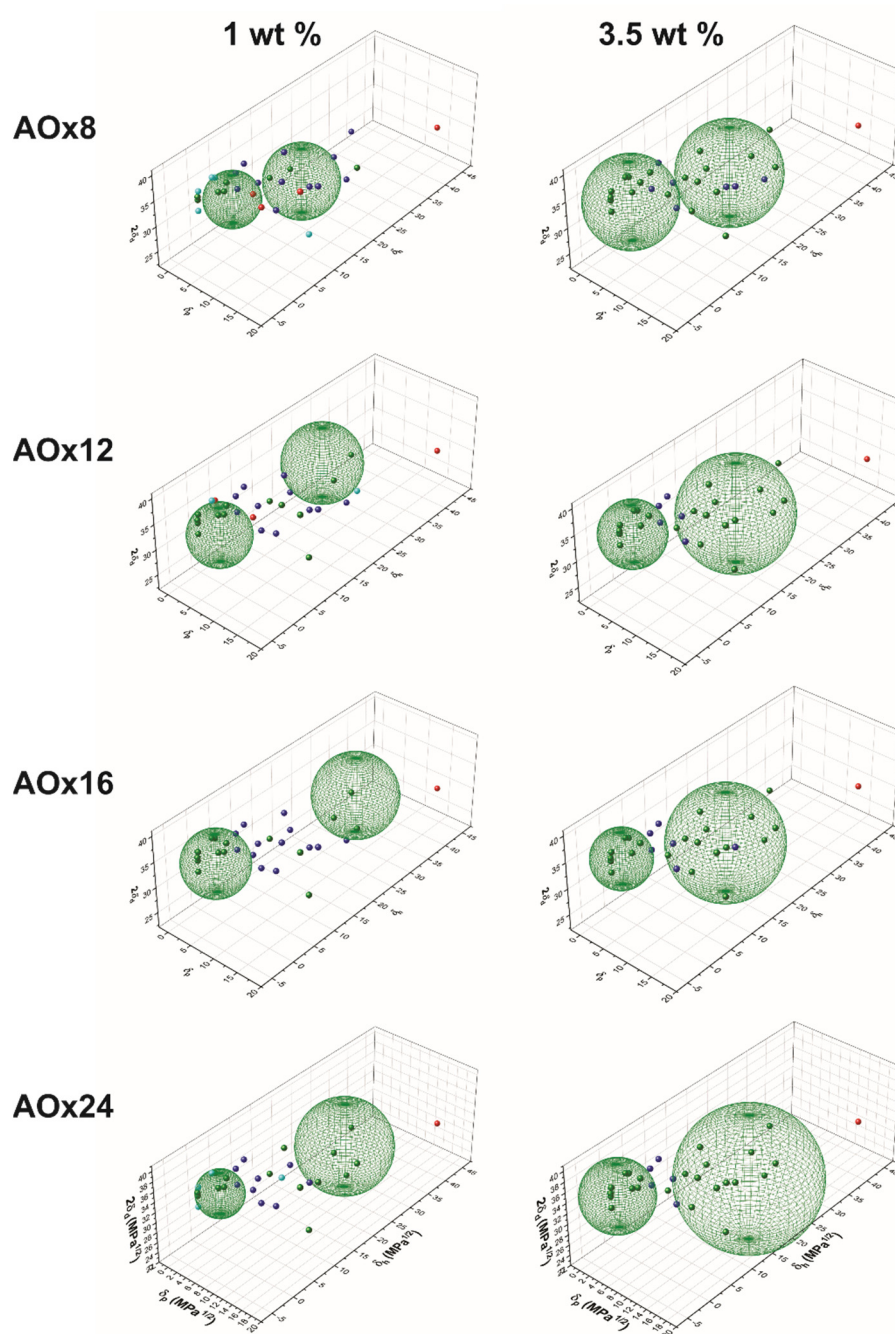

**Figure S5.** 3D Hansen space for gelation spheres (green) for alkyloxalamido gelators.

**Table S3.** Coordinates of the Centers of the Solution (S) and Gelation Spheres (G1, G2) in Hansen Space and Their Radii.

| Gelator       | G1                                  |                                     |                                      |                                 | G2                                  |                                     |                                      |                                 |
|---------------|-------------------------------------|-------------------------------------|--------------------------------------|---------------------------------|-------------------------------------|-------------------------------------|--------------------------------------|---------------------------------|
|               | $\delta_p$<br>(MPa <sup>1/2</sup> ) | $\delta_h$<br>(MPa <sup>1/2</sup> ) | $2\delta_a$<br>(MPa <sup>1/2</sup> ) | Radius<br>(MPa <sup>1/2</sup> ) | $\delta_p$<br>(MPa <sup>1/2</sup> ) | $\delta_h$<br>(MPa <sup>1/2</sup> ) | $2\delta_a$<br>(MPa <sup>1/2</sup> ) | Radius<br>(MPa <sup>1/2</sup> ) |
| <b>1 wt %</b> |                                     |                                     |                                      |                                 |                                     |                                     |                                      |                                 |
| AOx8          | 4.12                                | 1.15                                | 32.02                                | 4.72                            | 7.69                                | 16.32                               | 30.22                                | 6.45                            |
| AOx12         | 3.62                                | 1.17                                | 30.72                                | 5.35                            | 7.68                                | 21.57                               | 35.66                                | 6.84                            |
| AOx16         | 3.56                                | 0.47                                | 32.90                                | 5.70                            | 11.74                               | 25.18                               | 36.60                                | 7.29                            |
| AOx24         | 2.62                                | 2.41                                | 32.30                                | 4.04                            | 11.63                               | 22.52                               | 34.82                                | 8.20                            |

| 3.5 wt % |      |      |       |      |       |       |       |       |
|----------|------|------|-------|------|-------|-------|-------|-------|
| AOx8     | 3.46 | 0.85 | 32.92 | 7.49 | 9.15  | 17.38 | 31.90 | 8.67  |
| AOx12    | 2.01 | 0.82 | 32.46 | 5.46 | 10.24 | 15.51 | 32.04 | 9.57  |
| AOx16    | 1.16 | 1.18 | 32.36 | 4.96 | 10.01 | 15.42 | 31.60 | 9.59  |
| AOx24    | 1.50 | 0.00 | 32.80 | 6.00 | 16.20 | 13.70 | 35.40 | 11.70 |

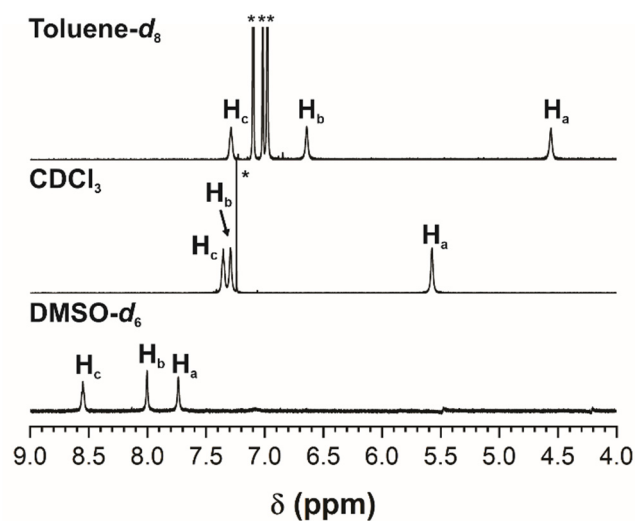

**Figure S6.**  $^1\text{H}$  NMR spectra (600 MHz) of the amide region for **AOx24** in different solvents.

**Table S4.**  $^1\text{H}$  NMR chemical shifts (ppm) of  $\text{H}_a$  and  $\text{H}_b$  for alkyloxalamides (20 mM) in  $\text{CDCl}_3$ ,  $\text{DMSO}-d_6$  and toluene- $d_8$  at  $23^\circ\text{C}$ .

| Solvent | DMSO- $d_6$  |              |              |                     | Toluene- $d_8$ |              |              |                     | CDCl $_3$    |              |              |                     |
|---------|--------------|--------------|--------------|---------------------|----------------|--------------|--------------|---------------------|--------------|--------------|--------------|---------------------|
|         | $\text{H}_c$ | $\text{H}_b$ | $\text{H}_a$ | $\Delta\delta_{ba}$ | $\text{H}_c$   | $\text{H}_b$ | $\text{H}_a$ | $\Delta\delta_{ba}$ | $\text{H}_c$ | $\text{H}_b$ | $\text{H}_a$ | $\Delta\delta_{ba}$ |
| AOx8    | 8.52         | 7.99         | 7.71         | 0.28                | 7.38           | 6.56         | 4.38         | 2.18                | 7.37         | 7.30         | 5.57         | 1.73                |
| AOx12   | 8.53         | 7.99         | 7.71         | 0.28                | 7.23           | 6.55         | 4.33         | 2.22                | 7.31         | 7.29         | 5.56         | 1.73                |
| AOx16   | 8.54         | 7.99         | 7.71         | 0.28                | 7.30           | 6.69         | 4.69         | 2.00                | 7.30         | 7.30         | 5.57         | 1.73                |
| AOx24   | 8.52         | 7.98         | 7.71         | 0.28                | 7.29           | 6.64         | 4.55         | 1.09                | 7.36         | 7.30         | 5.58         | 1.72                |

\* $\Delta\delta_{ba} = \delta\text{H}_b - \delta\text{H}_a$

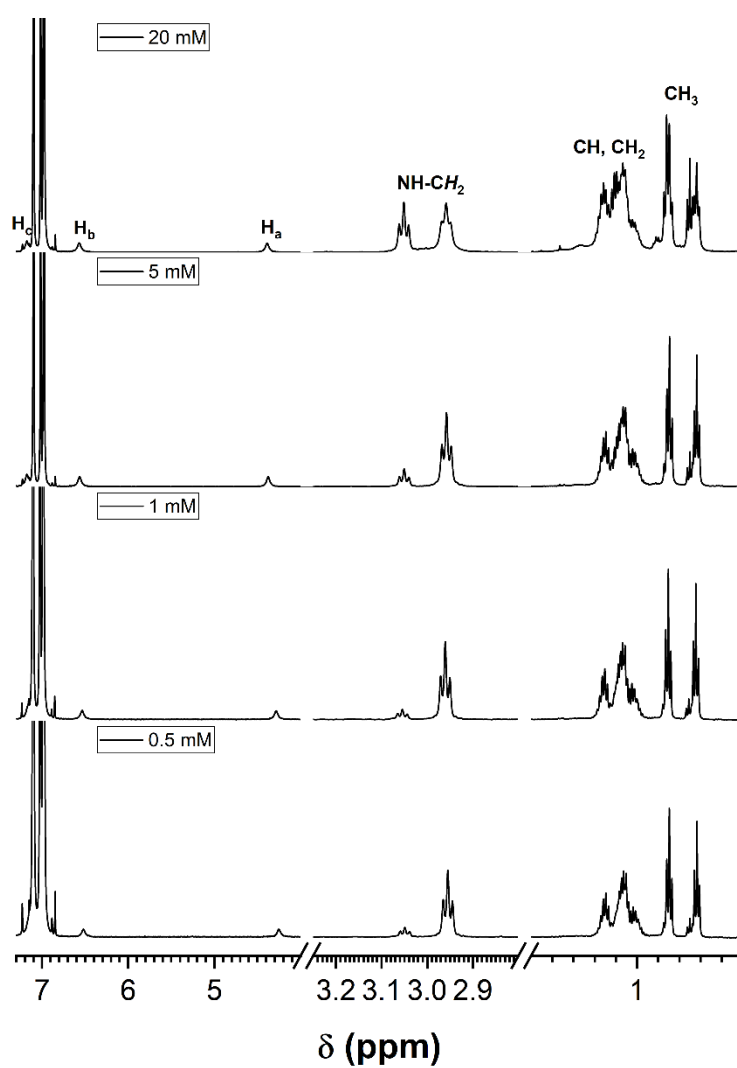

**Figure S7.**  $^1\text{H}$  NMR (600 MHz) spectra of AOx8 in toluene- $d_8$  from 0.5–50 mM.

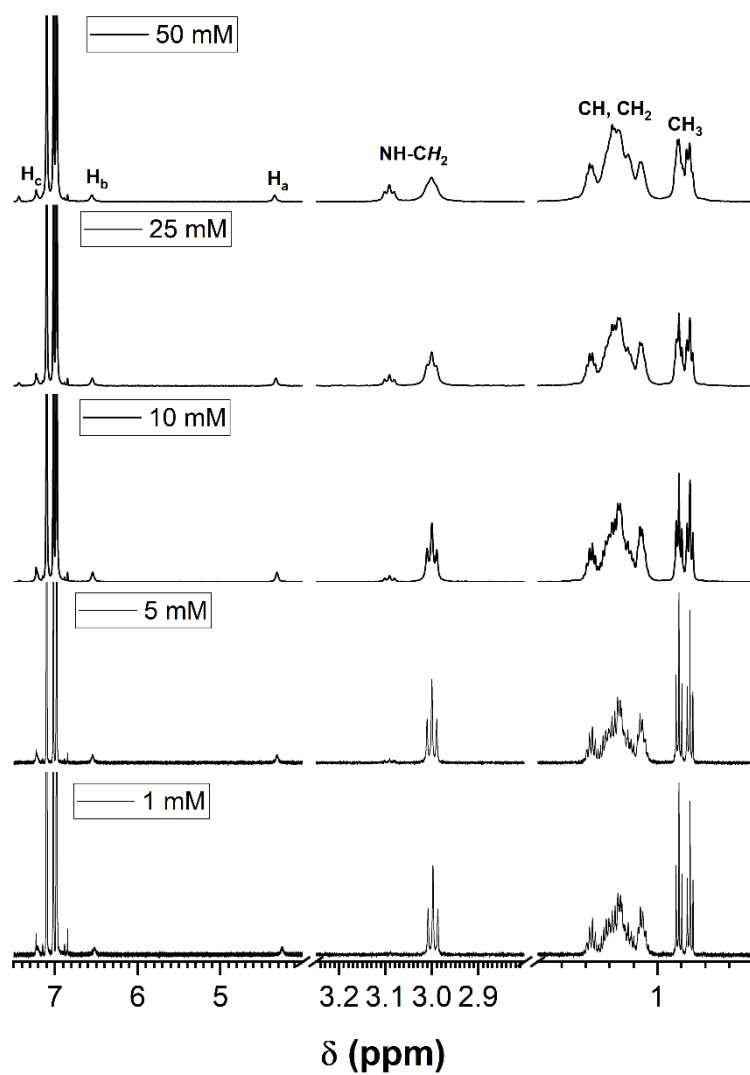

**Figure S8.**  $^1\text{H}$  NMR (600 MHz) spectra of AOx12 in  $\text{toluene-}d_8$  from 1–50 mM.



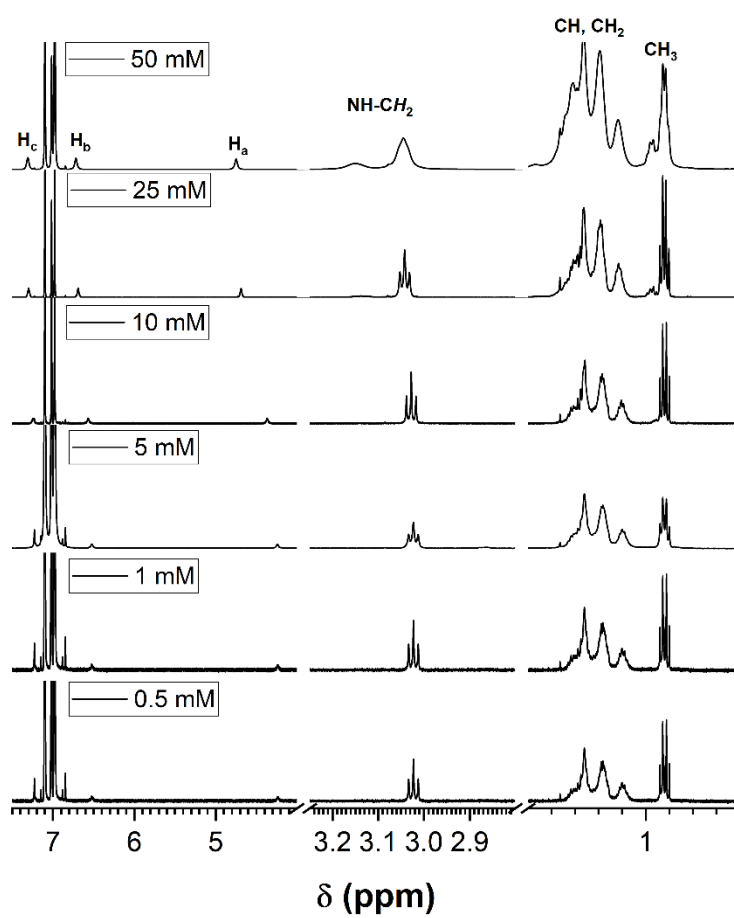

**Figure S9.**  $^1\text{H}$  NMR (600 MHz) spectra of AOx16 in  $\text{toluene-}d_8$  from 0.5–50 mM.

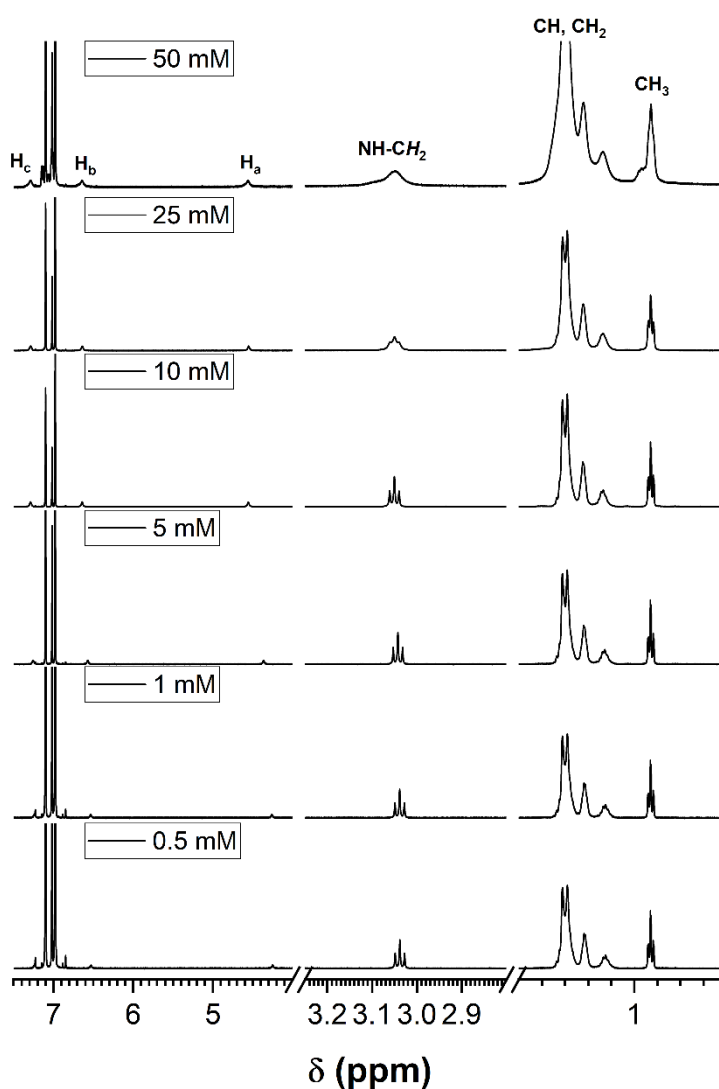

**Figure S10.**  $^1\text{H}$  NMR (600 MHz) spectra of **AOx24** in toluene- $d_8$  from 0.5–50 mM. Note that the 50 mM sample was a clear gel.

**Table S5.** FTIR data for alkylated oxalamide gelators.

| Sample                 | N-H str ( $\text{cm}^{-1}$ ) | C=O str ( $\text{cm}^{-1}$ ) |
|------------------------|------------------------------|------------------------------|
| <b>AOx8</b>            |                              |                              |
| Powder                 | 3373m, 3309m, 3186m          | 1699w, 1653s                 |
| Xerogel (Toluene)      | 3373m, 3309m, 3182m          | 1699w, 1651s                 |
| $\text{CHCl}_3$ , soln | 3514m, 3467w, 3396m, 3315w   | 1718w, 1685s, 1653w          |
| Toluene, soln          | 3438w, 3377m, 3313m          | 3438w, 3377m, 3313m          |
| DMSO                   |                              | 1675                         |
| <b>AOx12</b>           |                              |                              |
| Powder                 | 3375m, 3311m, 3190w          | 1699w, 1653s                 |
| Xerogel (Toluene)      | 3381m, 3311m, 3203m          | 1716w, 1695w, 1653s          |
| $\text{CHCl}_3$ , soln | 3514m, 3464w, 3394m, 3313m   | 1685m, 1655w                 |
| Toluene, soln          | 3502w, 3379m, 3309m, 3197w   | 1689w, 1655s                 |
| DMSO                   |                              | 1676                         |
| <b>AOx16</b>           |                              |                              |
| Powder                 | 3386m, 3313m, 3209m          | 1693w, 1651m                 |

|                          |                            |                            |
|--------------------------|----------------------------|----------------------------|
| Xerogel (Toluene)        | 3384m, 3311m, 3205m        | 1695w, 1651s               |
| CHCl <sub>3</sub> , soln | 3514m, 3460w, 3394m, 3313w | 1720w, 1685s, 1655w        |
| Toluene, soln            | 3595m, 3498m, 3386m, 3317w | 1720m, 1689s, 1651m, br sh |
| DMSO                     |                            | 1677                       |
| <b>AOx24</b>             |                            |                            |
| Powder                   | 3384m, 3309m, 3213w        | 1653s                      |
| Xerogel (Toluene)        | 3384m, 3307m, 3215w        | 1653s                      |
| CHCl <sub>3</sub> , soln | 3514m, 3394m, 3309w, 3282w | 1716w, 1685s, 1651w        |
| Toluene, soln            | 3498m, 3386m, 3313m, 3213w | 1720w, 1689s, 1655m        |
| DMSO                     |                            | 1655                       |

Soln = solution. All solutions were 0.5 wt %. s = strong. m = medium. w = weak. br sh = broad shoulder.

**Table S6.** Gel melting point  $T_{gel}$  of gelators in hexadecane and propylene glycol at 1 and 2 wt % from inverted vial and rheology temperature sweep experiments.

| Gelator | Hexadecane (°C) |               |       | Propylene glycol (°C) |               |       |
|---------|-----------------|---------------|-------|-----------------------|---------------|-------|
|         | Rheology        | Inverted Vial |       | Rheology              | Inverted Vial |       |
|         | 1 wt%           | 1 wt%         | 2 wt% | 1 wt%                 | 1 wt%         | 2 wt% |
| AOx8    | 96              | 90            | 131   | -                     | -             | -     |
| AOx12   | 110             | 87            | 109   | 66                    | 57            | 73    |
| AOx16   | 114             | 87            | 94    | 64                    | 68            | 81    |
| AOx24   | 81              | 68            | 70    | 99                    | 70            | 84    |

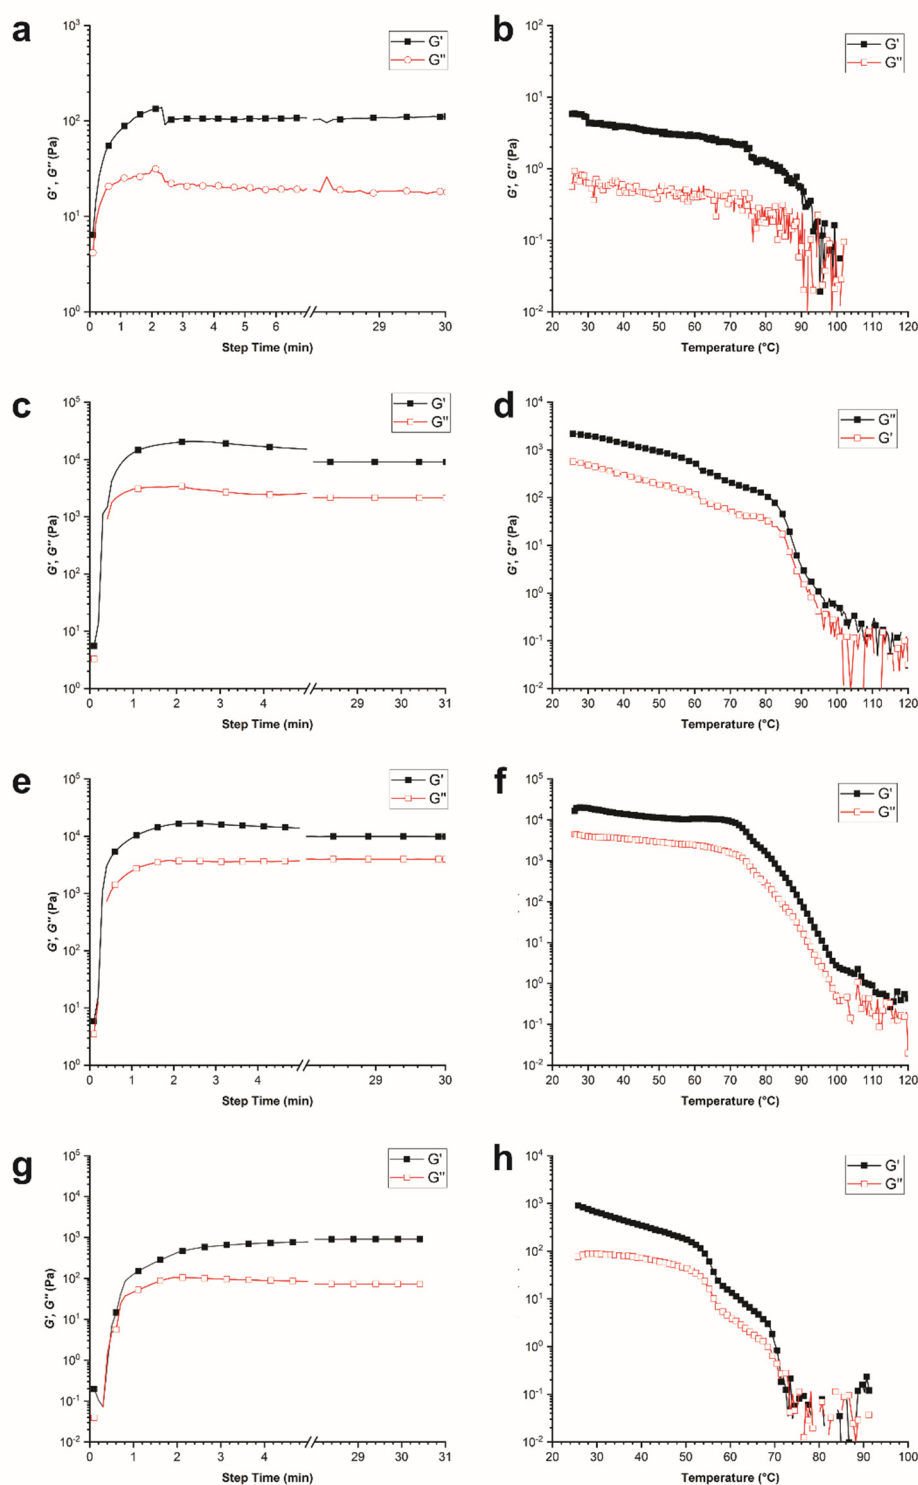

**Figure S11.** Rheology gel time and temperature sweep experiments for organogels of AOx8 (a, b), AOx12 (c, d), AOx16 (e, f) and AOx24 (g, h) with hexadecane.

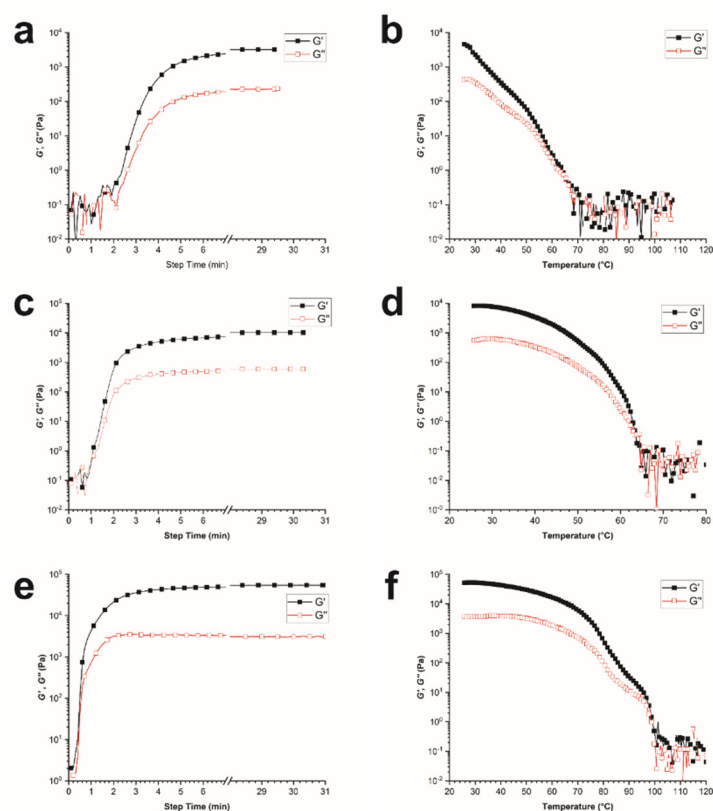

**Figure S12.** Rheology gel time and temperature sweep experiments organogels of AOx12 (a, b), AOx16 (c, d) and AOx24 (e, f) with propylene glycol.

**Table S7.** Rheological properties of organogels with hexadecane (HD) and propylene glycol (PG) at 1 wt % at 25°C.

| Gelator | Solvent | $\gamma_c$ (%) | Crossover Strain (%) | $G'$ (Pa) | $G''$ (Pa) | $G'/G''$ | $\tan\delta$<br>( $G''/G'$ ) |
|---------|---------|----------------|----------------------|-----------|------------|----------|------------------------------|
|         |         |                | $G' = G''$           |           |            |          |                              |
| AOx8    | HD      | 0.20           | 25                   | 105       | 18         | 5.63     | 0.171                        |
| AOx12   | HD      | 0.48           | 55                   | 9230      | 2517       | 3.7      | 0.273                        |
| AOx16   | HD      | 0.88           | 45                   | 10714     | 4462       | 2.4      | 0.416                        |
| AOx24   | HD      | 1.33           | 55                   | 945       | 70         | 13.5     | 0.074                        |
| AOx8    | PG      | -              | -                    | -         | -          | -        | -                            |
| AOx12   | PG      | 0.60           | 10                   | 2600      | 244        | 10.7     | 0.094                        |
| AOx16   | PG      | 0.60           | ~100                 | 10728     | 653        | 16.4     | 0.061                        |
| AOx24   | PG      | 1.50           | ~100                 | 56796     | 3093       | 18.4     | 0.054                        |

$\gamma_c$  = critical strain.  $G'$ ,  $G''$ , and  $G'/G''$  ratios at strain = 0.15% and frequency = 10 rad/s. \*Gel concentration was 1.5 wt %, since the gel at 1 wt % was not stable at larger scales. The gel underwent syneresis over several hours.

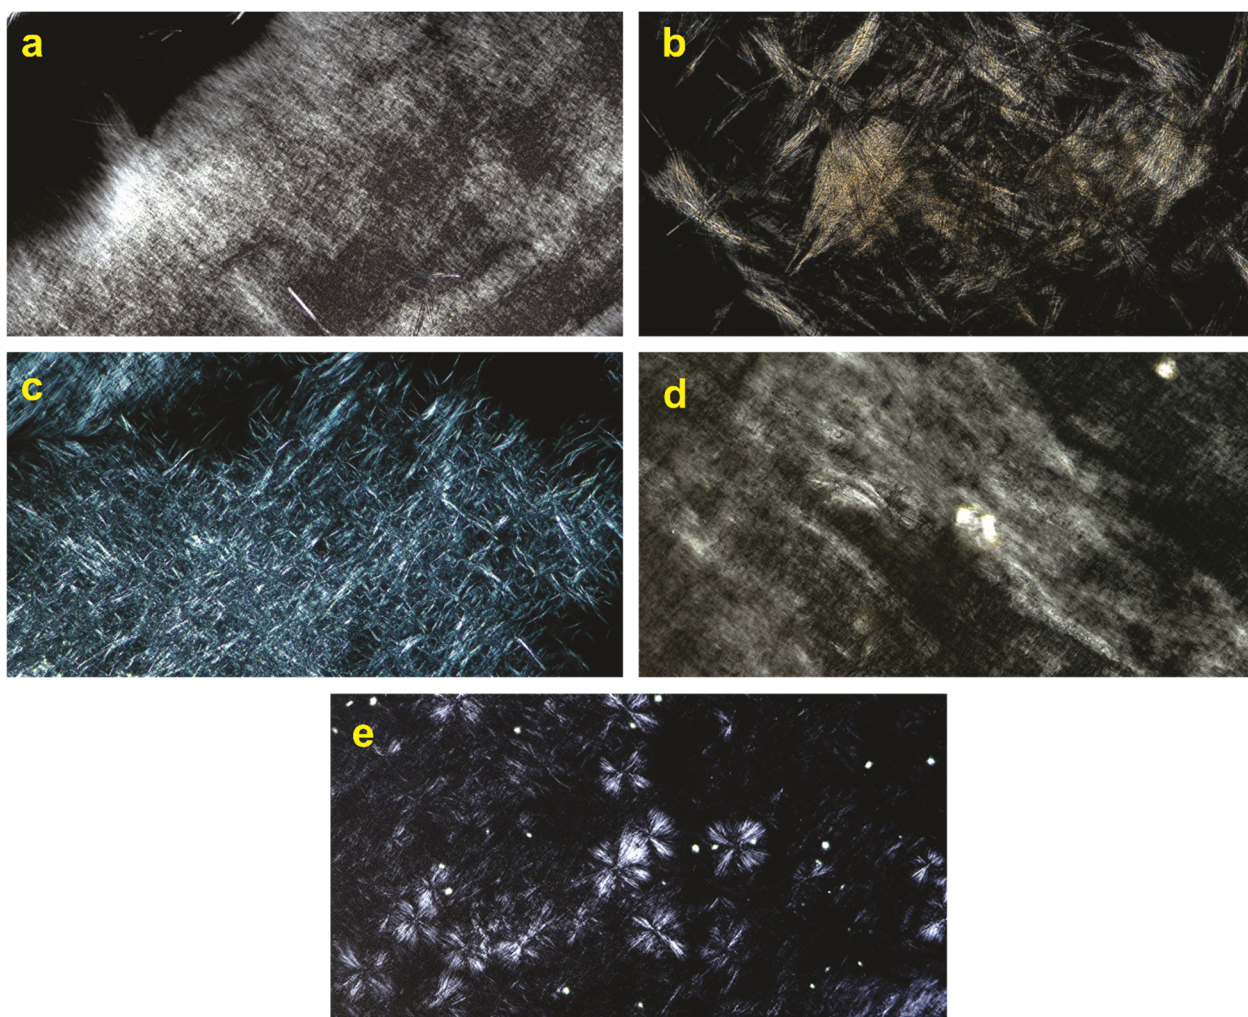

**Figure S13.** Polarized optical micrographs of gels from alkyloxalamides with hexadecane at 1 wt % after 1 month. (a) and (b) AOx12. (c) AOx16. (d) and (e) AOx24. The images are 1.42  $\mu\text{m}$  wide.

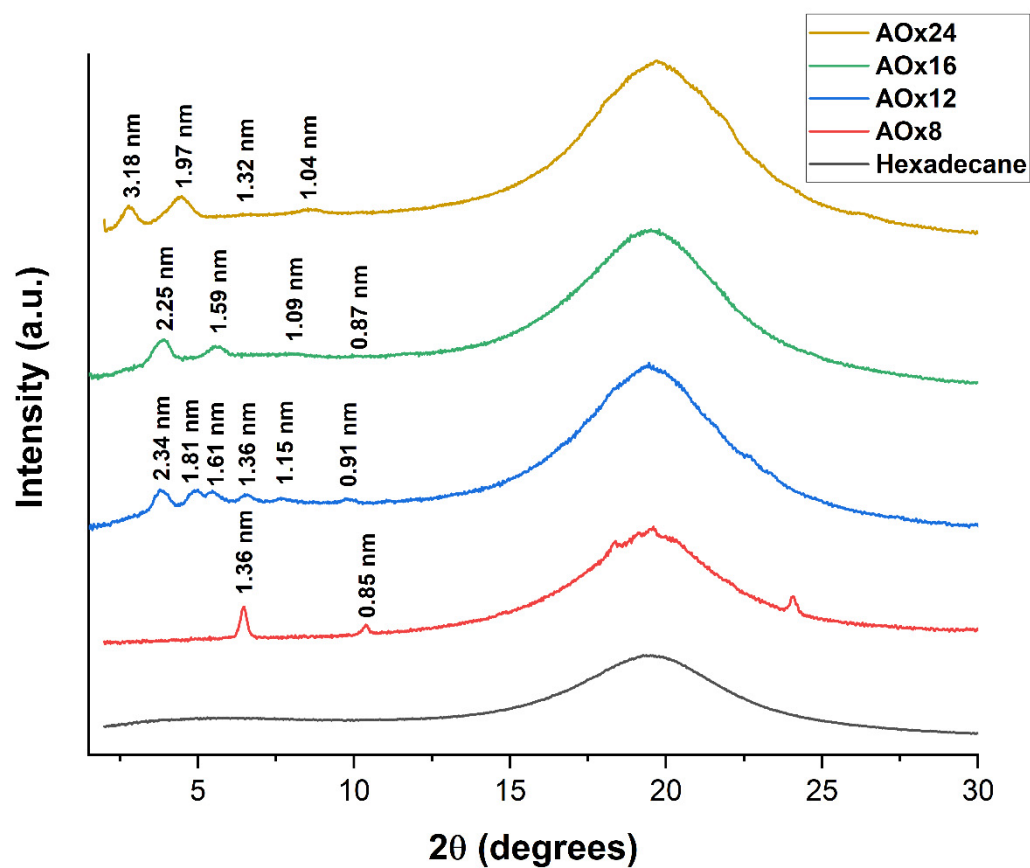

**Figure S14.** Powder X-Ray diffraction patterns of organogels of alkyloxalamide gelators with hexadecane. All gelator concentrations were 3 wt % except for AOx8, which was 1 wt %.

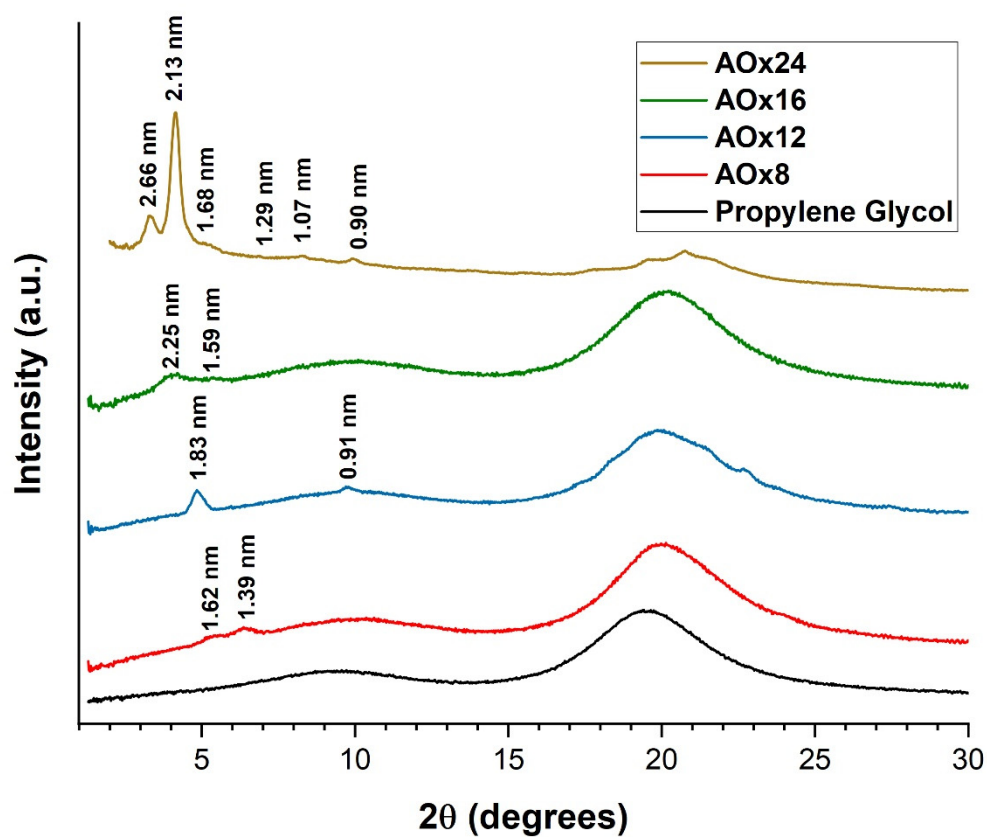

**Figure S15.** Powder X-Ray diffraction patterns of organogels of alkyloxalamide gelators with propylene glycol. All gelator concentrations were 5 wt %.

**Disclaimer/Publisher's Note:** The statements, opinions and data contained in all publications are solely those of the individual author(s) and contributor(s) and not of MDPI and/or the editor(s). MDPI and/or the editor(s) disclaim responsibility for any injury to people or property resulting from any ideas, methods, instructions or products referred to in the content.
